# Supplementary material for: Discovery of dibenzylbutane lignan LCA derivatives as potent anti-inflammatory agents
Source: Royal Society of Chemistry journal article supplement (doi:10.1039/d4md00053f), 2024-01-01
Supplement: d4md00053f1.pdf [file d4md00053f1.pdf]

## Supporting Information

### Discovery of Dibenzylbutane Lignan LCA Derivatives as Potent Anti-inflammatory Agents

Zhen Wang,<sup>‡b</sup> Juan Zhang,<sup>‡b</sup> Conghao Gai,<sup>a</sup> Jing Wang,<sup>a</sup> Xiaobin Zhuo,<sup>a</sup> Yan Song,<sup>c</sup>  
Yan Zou,<sup>a</sup> Peichao Zhang,<sup>a</sup> Guige Hou,<sup>d</sup> Qingguo Meng,<sup>\*b</sup> Qingjie Zhao,<sup>\*a</sup> and  
Xiaoyun Chai<sup>\*a</sup>

<sup>a</sup> *Department of Organic Chemistry, School of Pharmacy, Second Military Medical University, Shanghai 200433, China*

<sup>b</sup> *School of Pharmacy, Key Laboratory of Molecular Pharmacology and Drug Evaluation (Yantai University), Yantai University, Yantai 264005, China*

<sup>c</sup> *Navy Medical Center, Second Military Medical University, Shanghai 200433, China*

<sup>d</sup> *School of Pharmacy, Binzhou Medical University, Yantai 264003, China*

<sup>‡</sup>These authors contributed equally to this work.

\*Corresponding authors:

Xiaoyun Chai, E-mail: chaixy1207@163.com

Qingjie Zhao, E-mail: qjzhao\_325@126.com

Qingguo Meng, E-mail: qinggmeng@163.com

## Table of contents:

|                                                                                                               |    |
|---------------------------------------------------------------------------------------------------------------|----|
| 1. $^1\text{H}$ NMR and $^{13}\text{C}$ NMR spectrum of compound <b>2</b> .....                               | 4  |
| 2. $^1\text{H}$ NMR and $^{13}\text{C}$ NMR spectrum of compound <b>3</b> .....                               | 5  |
| 3. $^1\text{H}$ NMR, $^{13}\text{C}$ NMR and HRMS spectrum of compound <b>4</b> .....                         | 6  |
| 4. $^1\text{H}$ NMR, $^{13}\text{C}$ NMR and HRMS spectrum of compound <b>5</b> .....                         | 7  |
| 5. $^1\text{H}$ NMR, $^{13}\text{C}$ NMR and HRMS spectrum of compound <b>6</b> .....                         | 9  |
| 6. $^1\text{H}$ NMR and $^{13}\text{C}$ NMR spectrum of compound <b>7</b> .....                               | 10 |
| 7. $^1\text{H}$ NMR, $^{13}\text{C}$ NMR and HRMS spectrum of compound <b>8</b> .....                         | 11 |
| 8. $^1\text{H}$ NMR, $^{13}\text{C}$ NMR and HRMS spectrum of compound <b>10a</b> .....                       | 13 |
| 9. $^1\text{H}$ NMR, $^{13}\text{C}$ NMR and HRMS spectrum of compound <b>10b</b> .....                       | 14 |
| 10. $^1\text{H}$ NMR, $^{13}\text{C}$ NMR and HRMS spectrum of compound <b>10c</b> .....                      | 16 |
| 11. $^1\text{H}$ NMR, $^{13}\text{C}$ NMR and HRMS spectrum of compound <b>10d</b> .....                      | 17 |
| 12. $^1\text{H}$ NMR, $^{13}\text{C}$ NMR and HRMS spectrum of compound <b>10e</b> .....                      | 19 |
| 13. $^1\text{H}$ NMR, $^{13}\text{C}$ NMR and HRMS spectrum of compound <b>10f</b> .....                      | 20 |
| 14. $^1\text{H}$ NMR, $^{13}\text{C}$ NMR and HRMS spectrum of compound <b>10g</b> .....                      | 22 |
| 15. $^1\text{H}$ NMR, $^{13}\text{C}$ NMR, $^{19}\text{F}$ NMR and HRMS spectrum of compound <b>10h</b> ..... | 23 |
| 16. $^1\text{H}$ NMR, $^{13}\text{C}$ NMR and HRMS spectrum of compound <b>10i</b> .....                      | 25 |
| 17. $^1\text{H}$ NMR, $^{13}\text{C}$ NMR and HRMS spectrum of compound <b>10j</b> .....                      | 27 |
| 18. $^1\text{H}$ NMR, $^{13}\text{C}$ NMR and HRMS spectrum of compound <b>10k</b> .....                      | 28 |
| 19. $^1\text{H}$ NMR, $^{13}\text{C}$ NMR and HRMS spectrum of compound <b>10l</b> .....                      | 30 |
| 20. $^1\text{H}$ NMR, $^{13}\text{C}$ NMR and HRMS spectrum of compound <b>10m</b> .....                      | 31 |
| 21. $^1\text{H}$ NMR, $^{13}\text{C}$ NMR and HRMS spectrum of compound <b>10n</b> .....                      | 33 |
| 22. $^1\text{H}$ NMR, $^{13}\text{C}$ NMR and HRMS spectrum of compound <b>12a</b> .....                      | 34 |
| 23. $^1\text{H}$ NMR, $^{13}\text{C}$ NMR and HRMS spectrum of compound <b>12b</b> .....                      | 36 |
| 24. $^1\text{H}$ NMR, $^{13}\text{C}$ NMR and HRMS spectrum of compound <b>12c</b> .....                      | 37 |
| 25. $^1\text{H}$ NMR, $^{13}\text{C}$ NMR and HRMS spectrum of compound <b>12d</b> .....                      | 39 |
| 26. $^1\text{H}$ NMR, $^{13}\text{C}$ NMR and HRMS spectrum of compound <b>12e</b> .....                      | 40 |
| 27. $^1\text{H}$ NMR, $^{13}\text{C}$ NMR and HRMS spectrum of compound <b>12f</b> .....                      | 42 |
| 28. $^1\text{H}$ NMR, $^{13}\text{C}$ NMR and HRMS spectrum of compound <b>12g</b> .....                      | 43 |
| 29. $^1\text{H}$ NMR, $^{13}\text{C}$ NMR and HRMS spectrum of compound <b>12h</b> .....                      | 45 |
| 30. $^1\text{H}$ NMR, $^{13}\text{C}$ NMR and HRMS spectrum of compound <b>12i</b> .....                      | 46 |

31. Paw swelling thickness of mice in the *in vivo* anti-inflammatory experiments.....48

# 1. $^1\text{H}$ NMR and $^{13}\text{C}$ NMR spectrum of compound 2

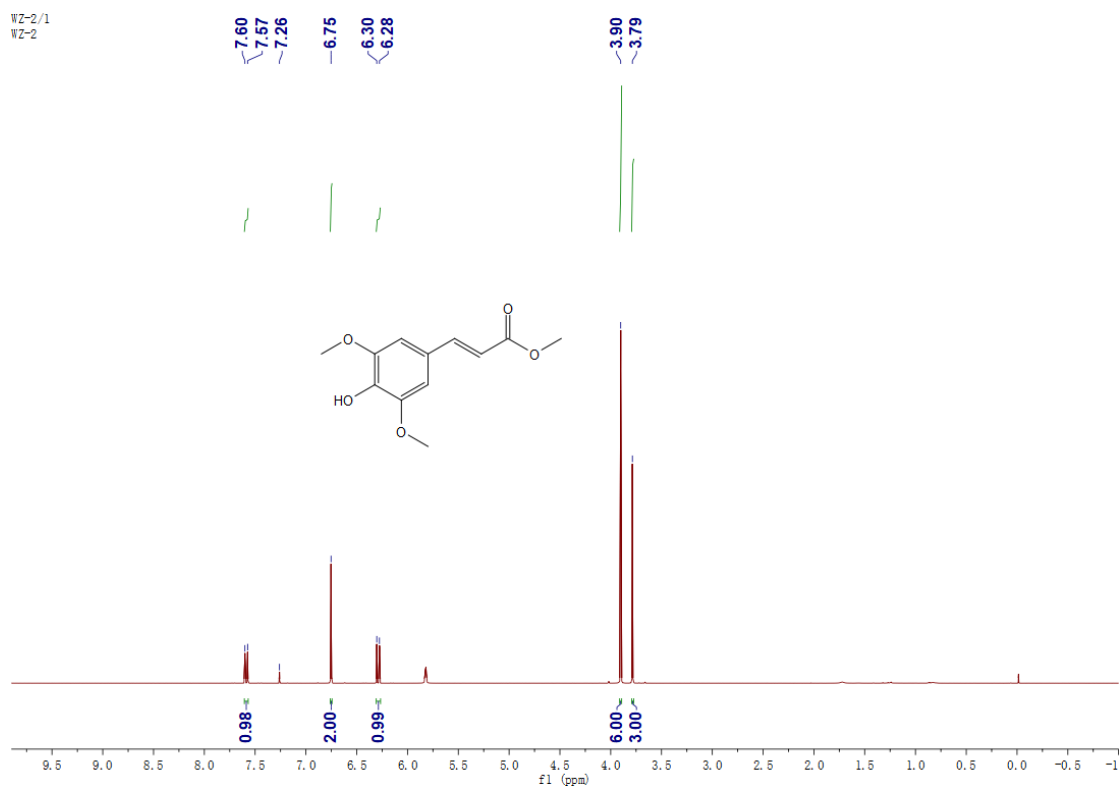

Figure S1.  $^1\text{H}$  NMR spectrum of compound 2

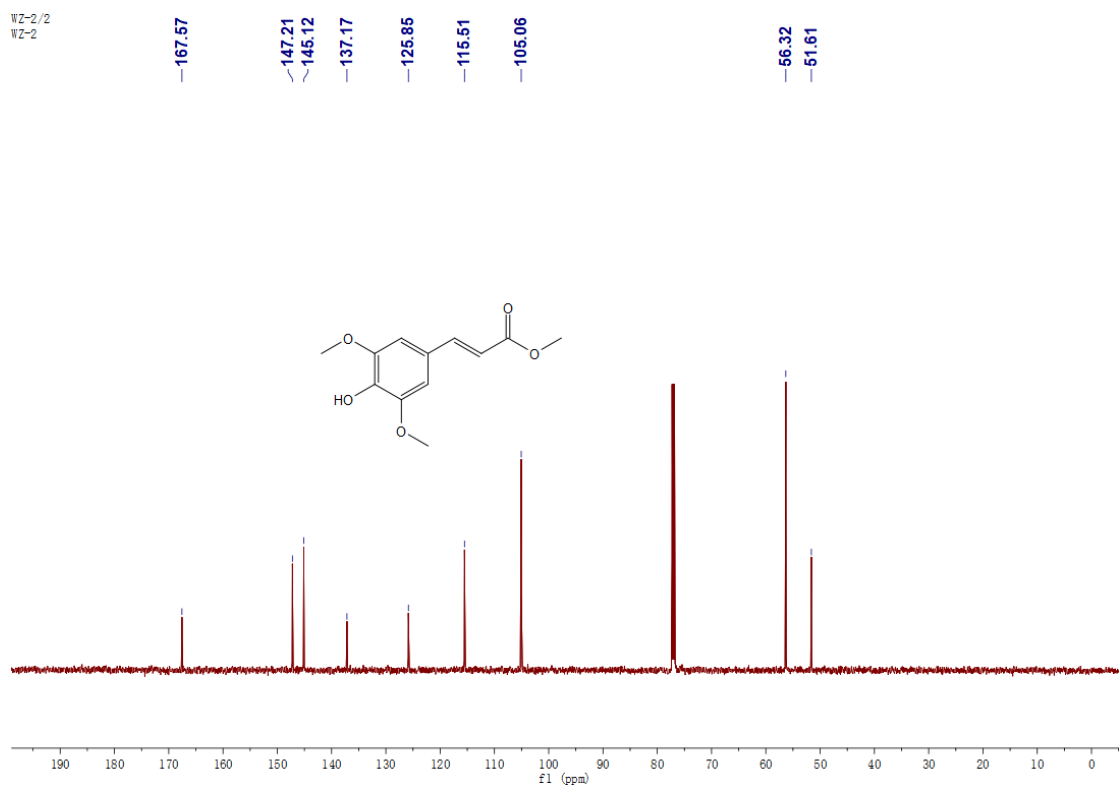

Figure S2.  $^{13}\text{C}$  NMR spectrum of compound 2

## 2. $^1\text{H}$ NMR and $^{13}\text{C}$ NMR spectrum of compound 3

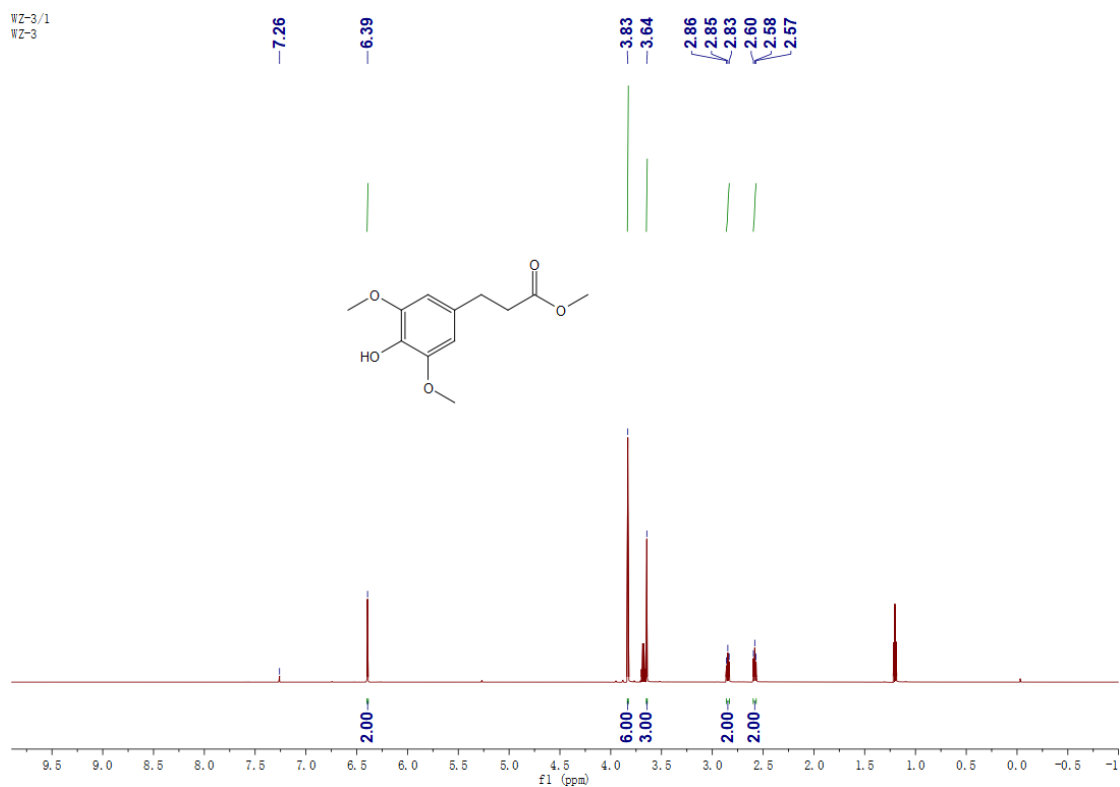

Figure S3.  $^1\text{H}$  NMR spectrum of compound 3

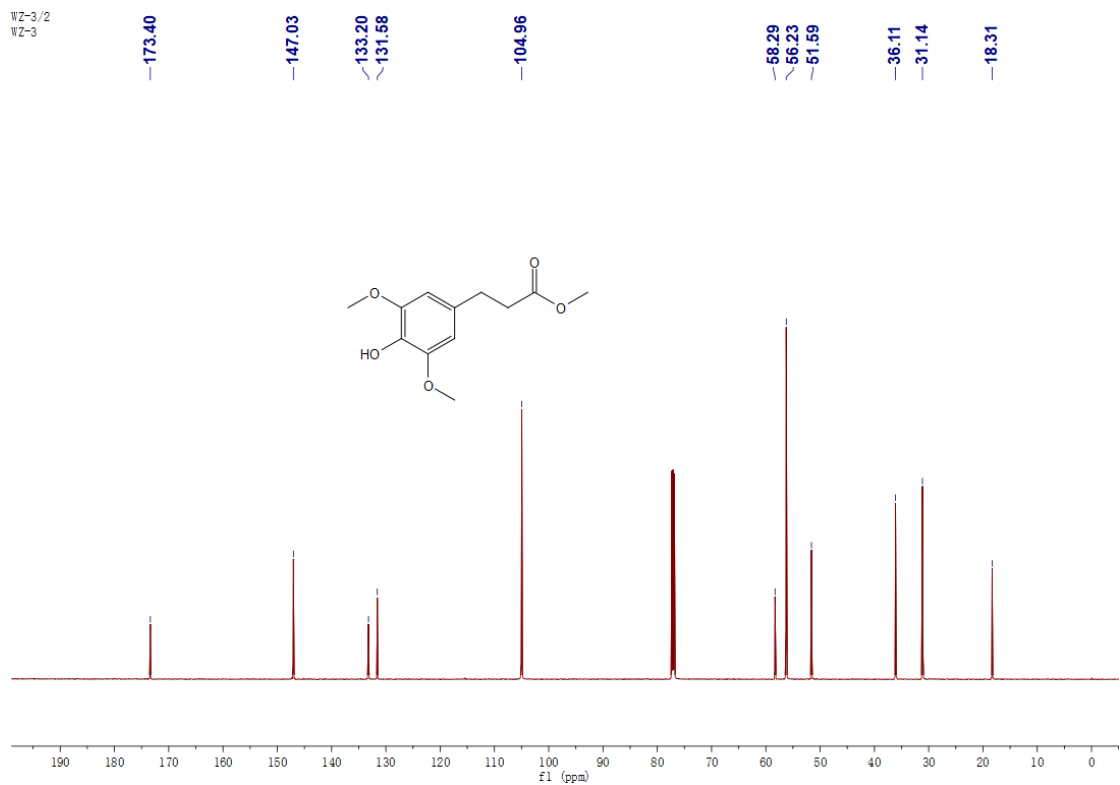

Figure S4.  $^{13}\text{C}$  NMR spectrum of compound 3

### 3. $^1\text{H}$ NMR, $^{13}\text{C}$ NMR and HRMS spectrum of compound 4

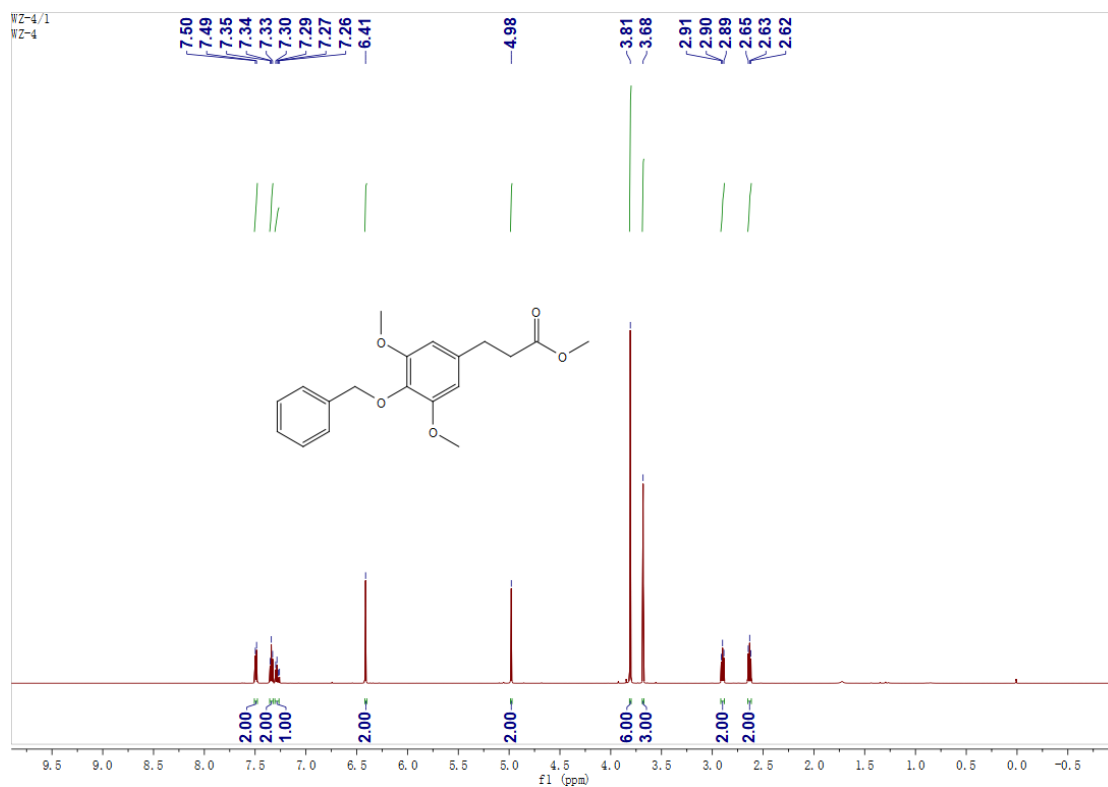

Figure S5.  $^1\text{H}$  NMR spectrum of compound 4

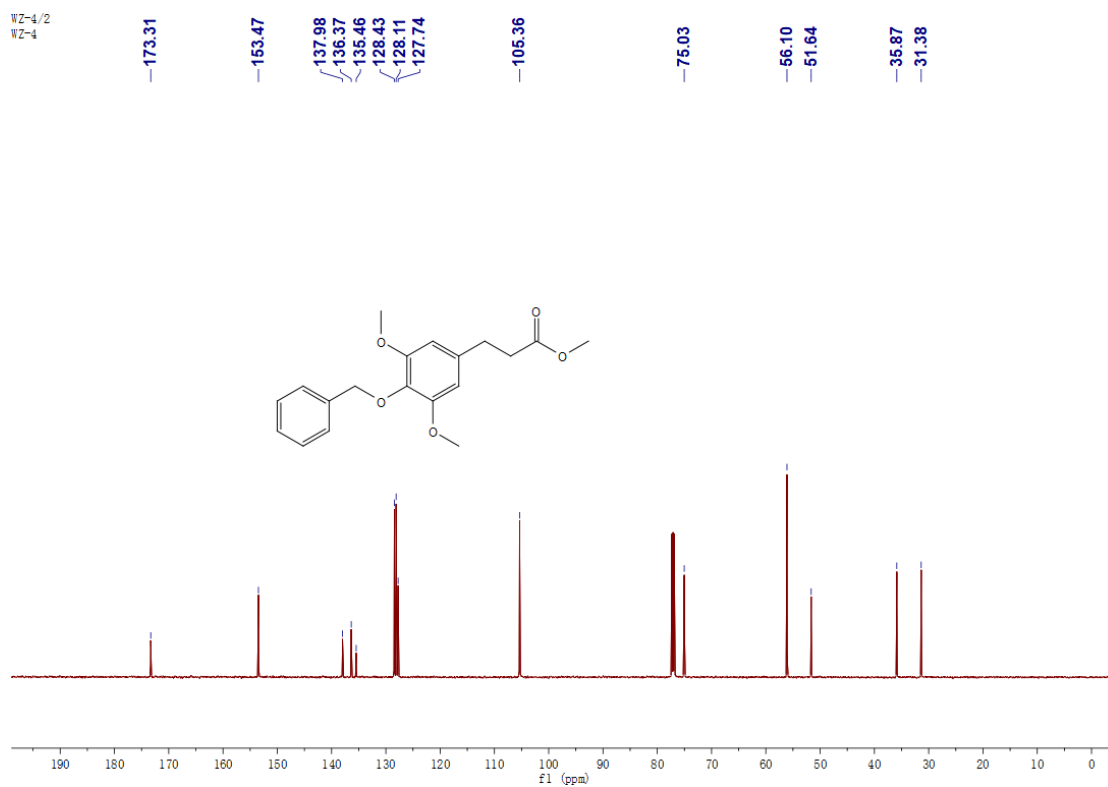

Figure S6.  $^{13}\text{C}$  NMR spectrum of compound 4

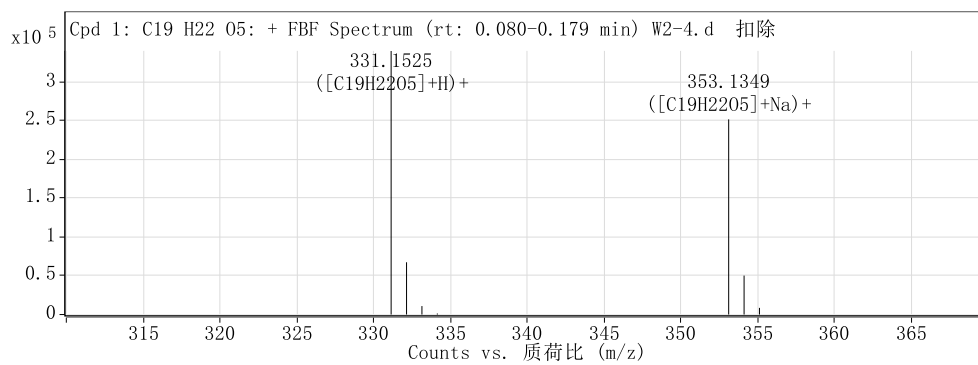

Figure S7. HRMS spectrum of compound 4

#### 4. <sup>1</sup>H NMR, <sup>13</sup>C NMR and HRMS spectrum of compound 5

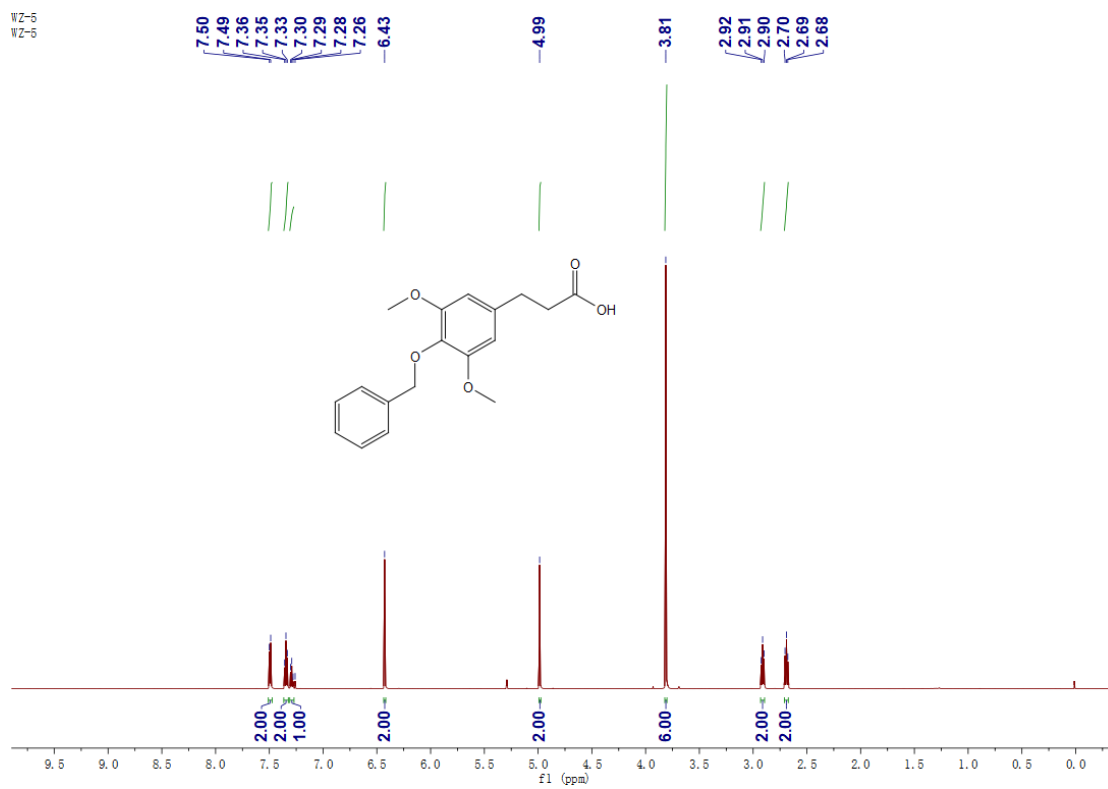

Figure S8. <sup>1</sup>H NMR spectrum of compound 5

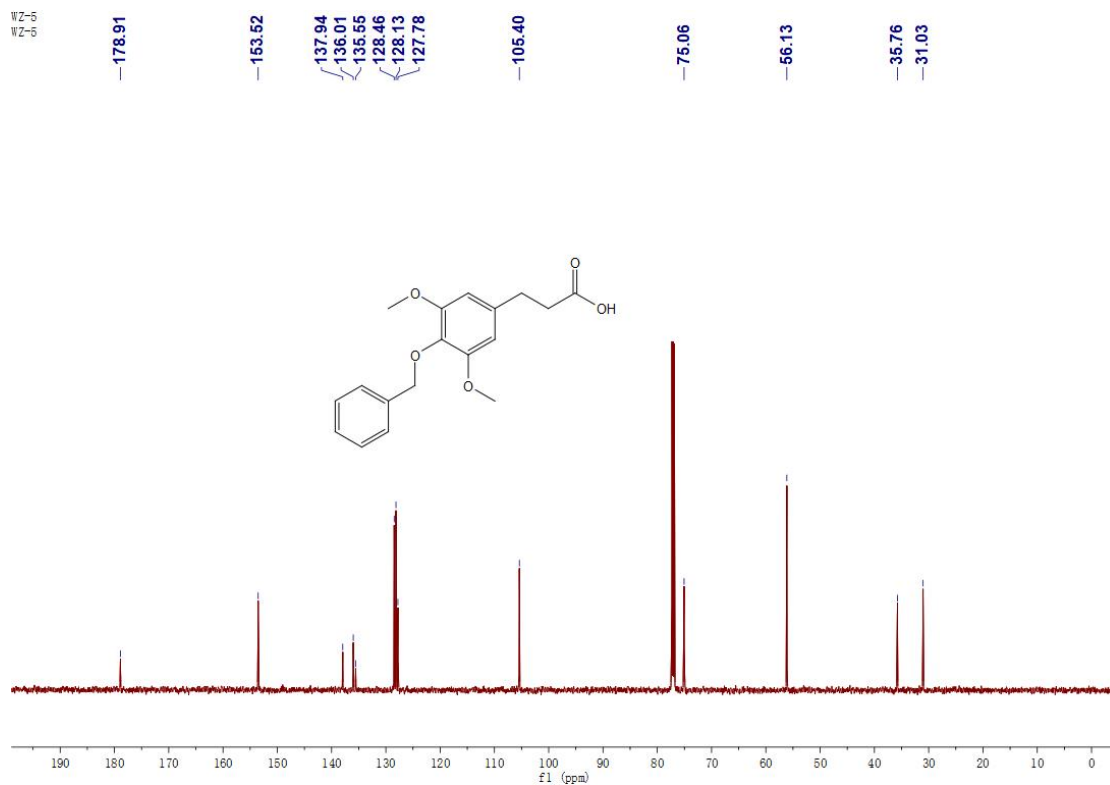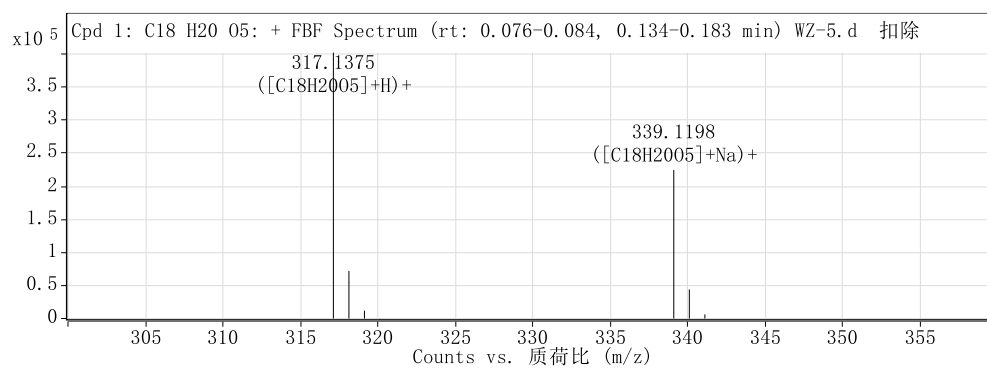

Figure S10. HRMS spectrum of compound 5



## 5. $^1\text{H}$ NMR, $^{13}\text{C}$ NMR and HRMS spectrum of compound 6

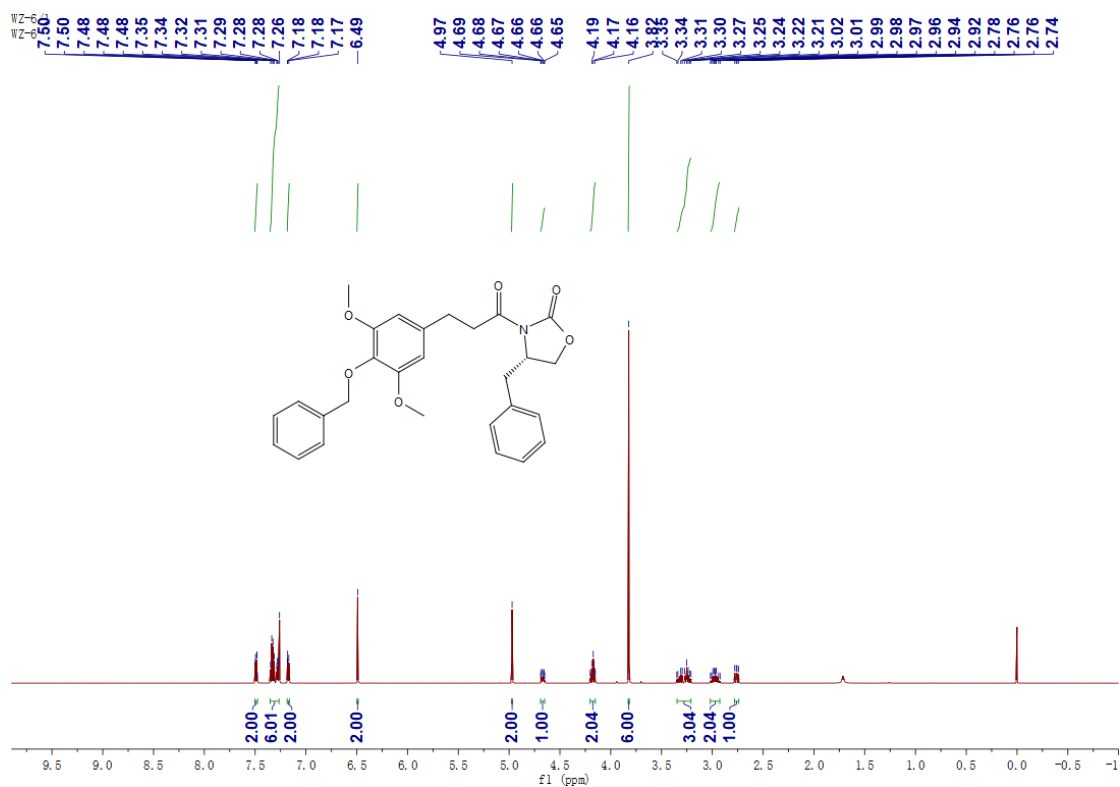

Figure S11.  $^1\text{H}$  NMR spectrum of compound 6

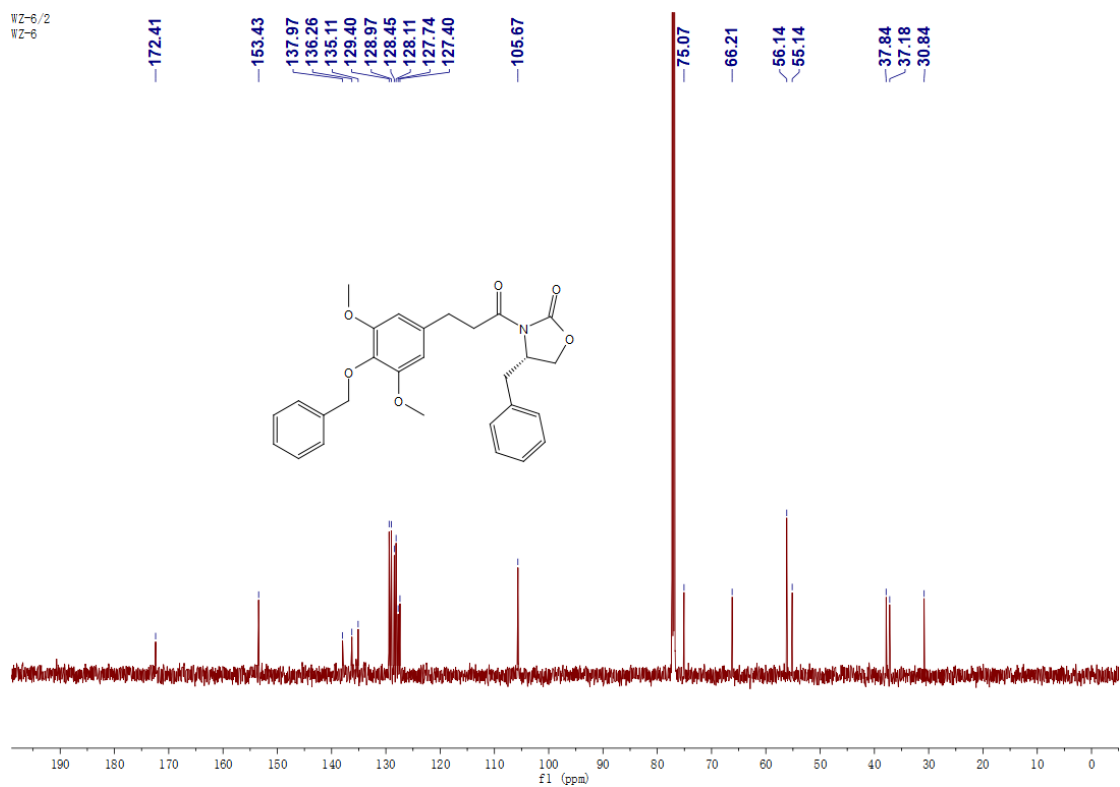

Figure S12.  $^{13}\text{C}$  NMR spectrum of compound 6

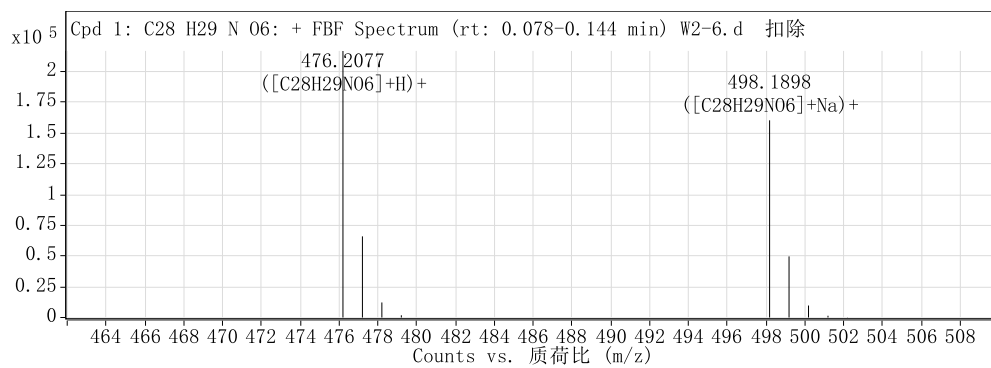

Figure S13. HRMS spectrum of compound 6

## 6. <sup>1</sup>H NMR and <sup>13</sup>C NMR spectrum of compound 7

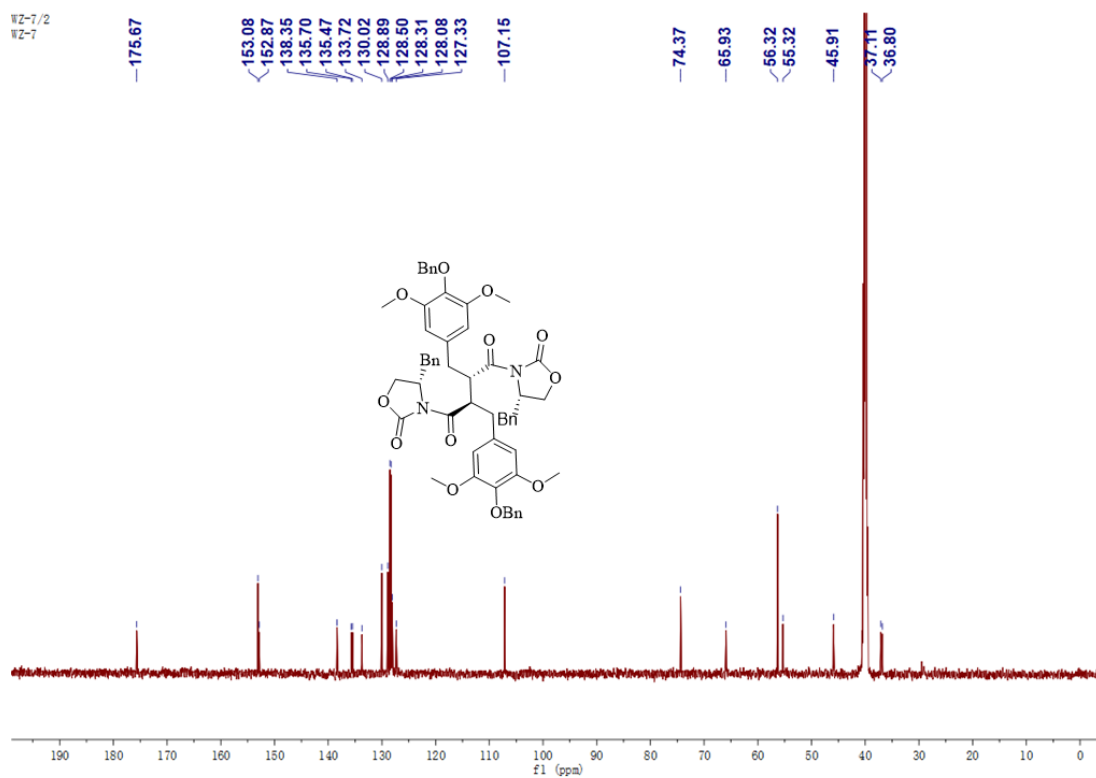

Figure S14. <sup>13</sup>C NMR spectrum of compound 7

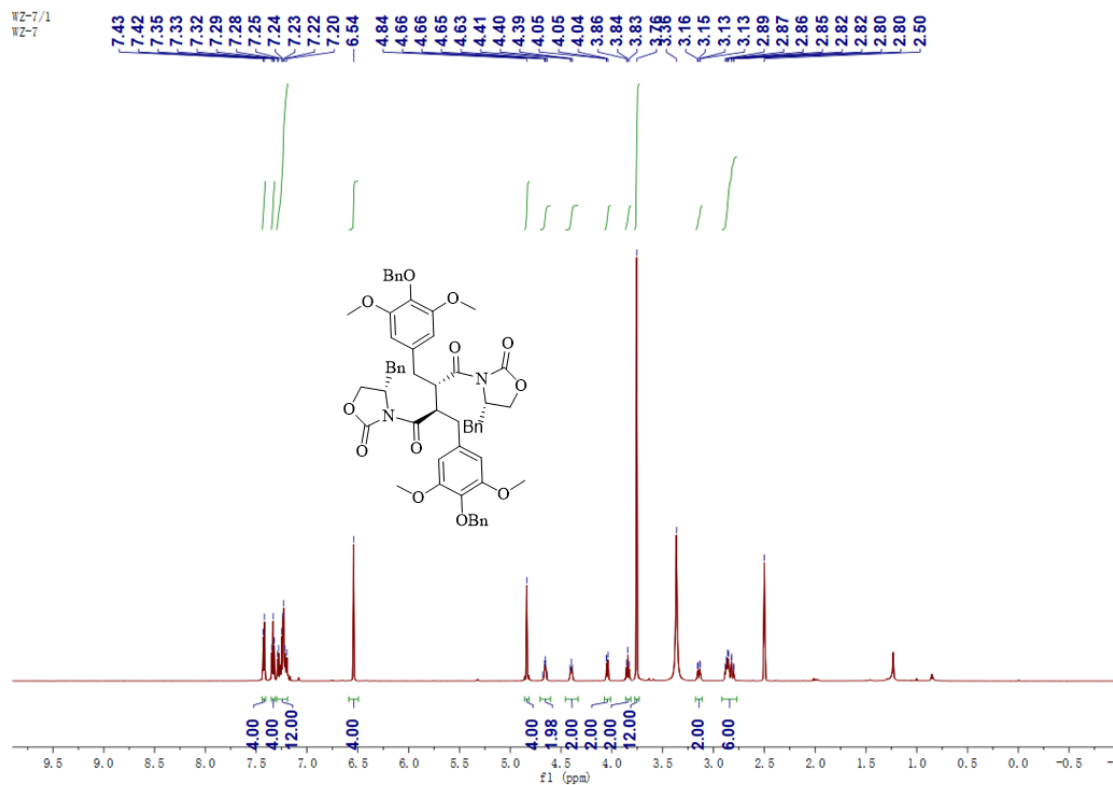

Figure S15.  $^{13}\text{C}$  NMR spectrum of compound 7

### 7. $^1\text{H}$ NMR, $^{13}\text{C}$ NMR and HRMS spectrum of compound 8

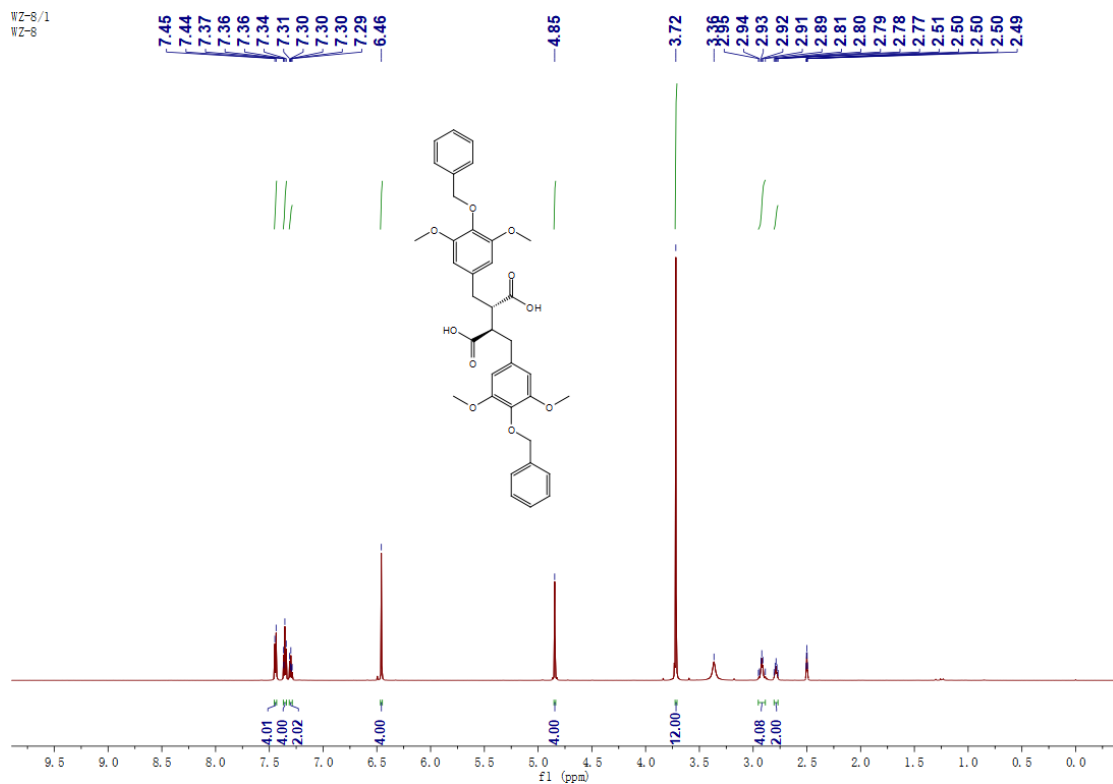

Figure S16.  $^1\text{H}$  NMR spectrum of compound 8

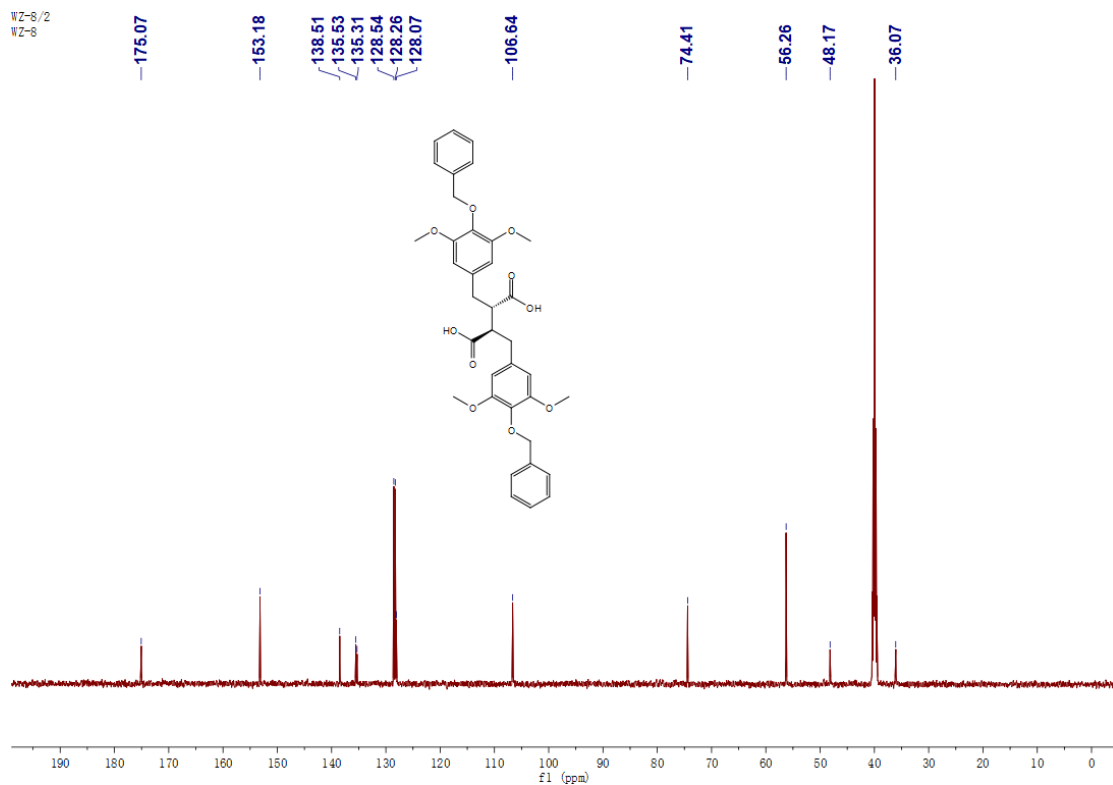

**Figure S17.**  $^{13}\text{C}$  NMR spectrum of compound **8**

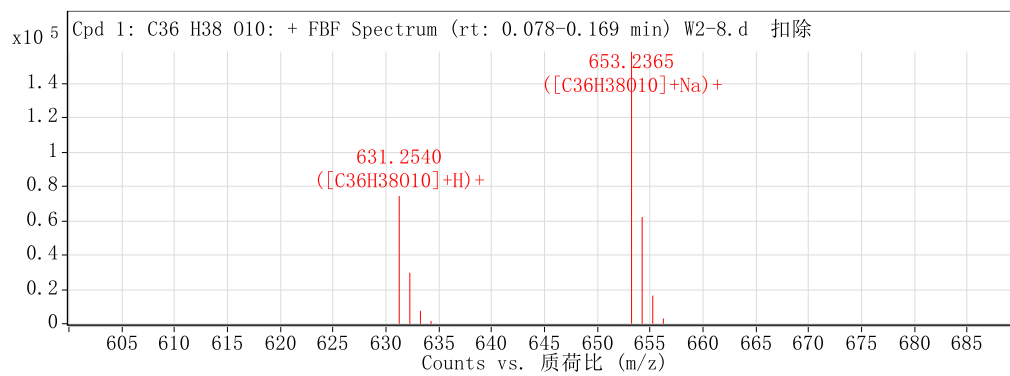

**Figure S18.** HRMS spectrum of compound **8**

## 8. $^1\text{H}$ NMR, $^{13}\text{C}$ NMR and HRMS spectrum of compound 10a

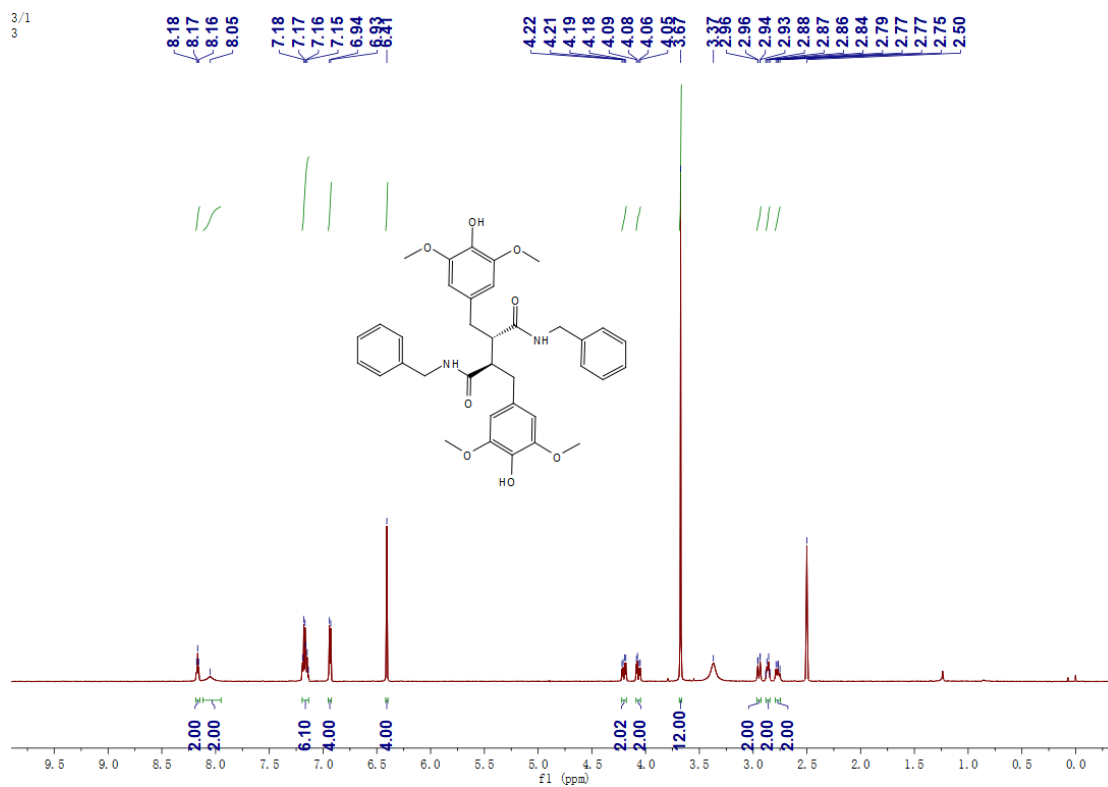

Figure S19.  $^1\text{H}$  NMR spectrum of compound 10a

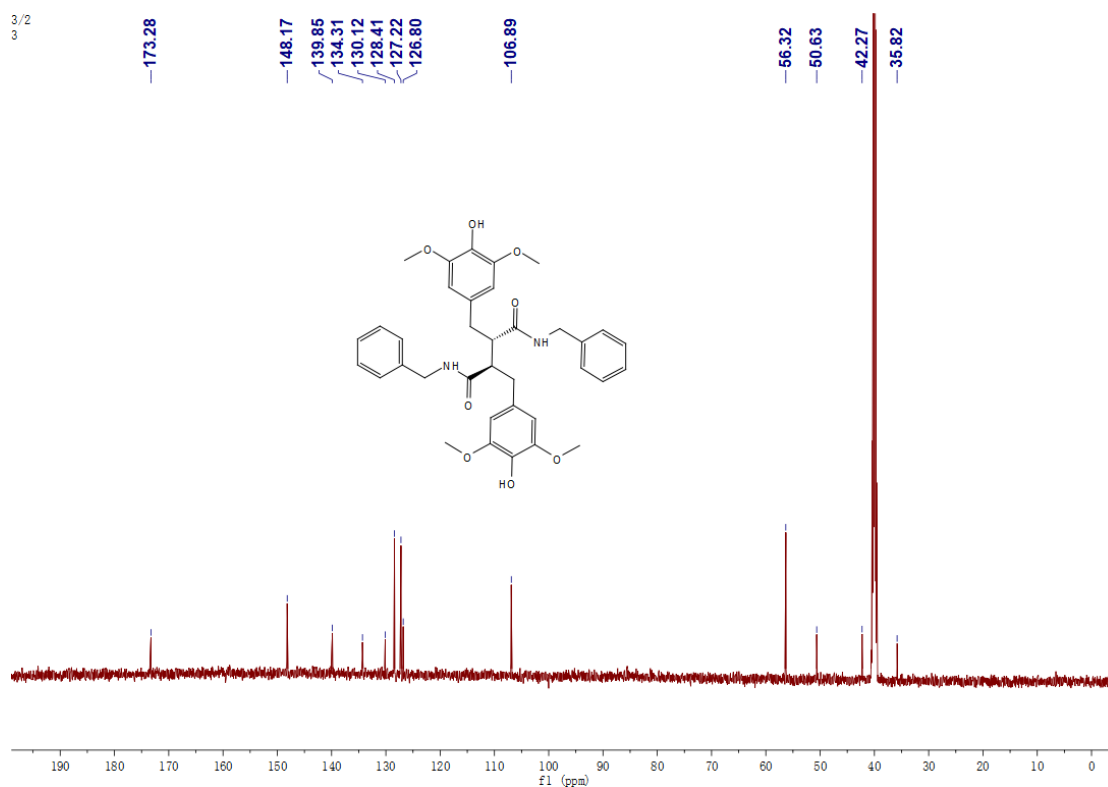

Figure S20.  $^{13}\text{C}$  NMR spectrum of compound 10a

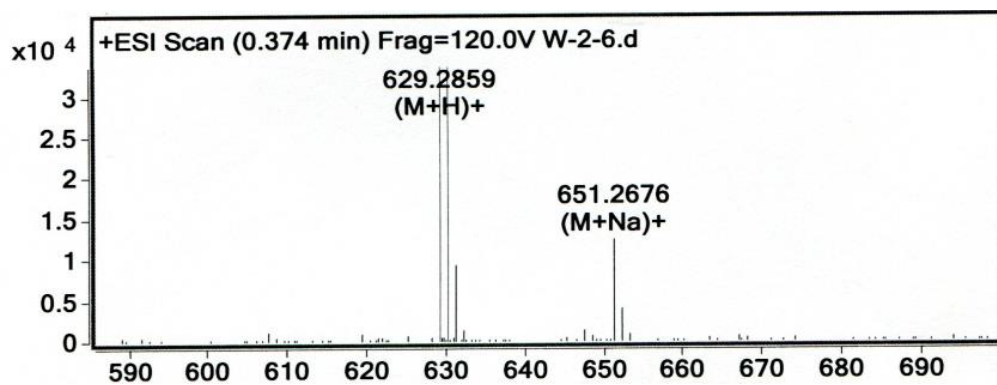

Figure S21. HRMS spectrum of compound 10a

9. <sup>1</sup>H NMR, <sup>13</sup>C NMR and HRMS spectrum of compound 10b

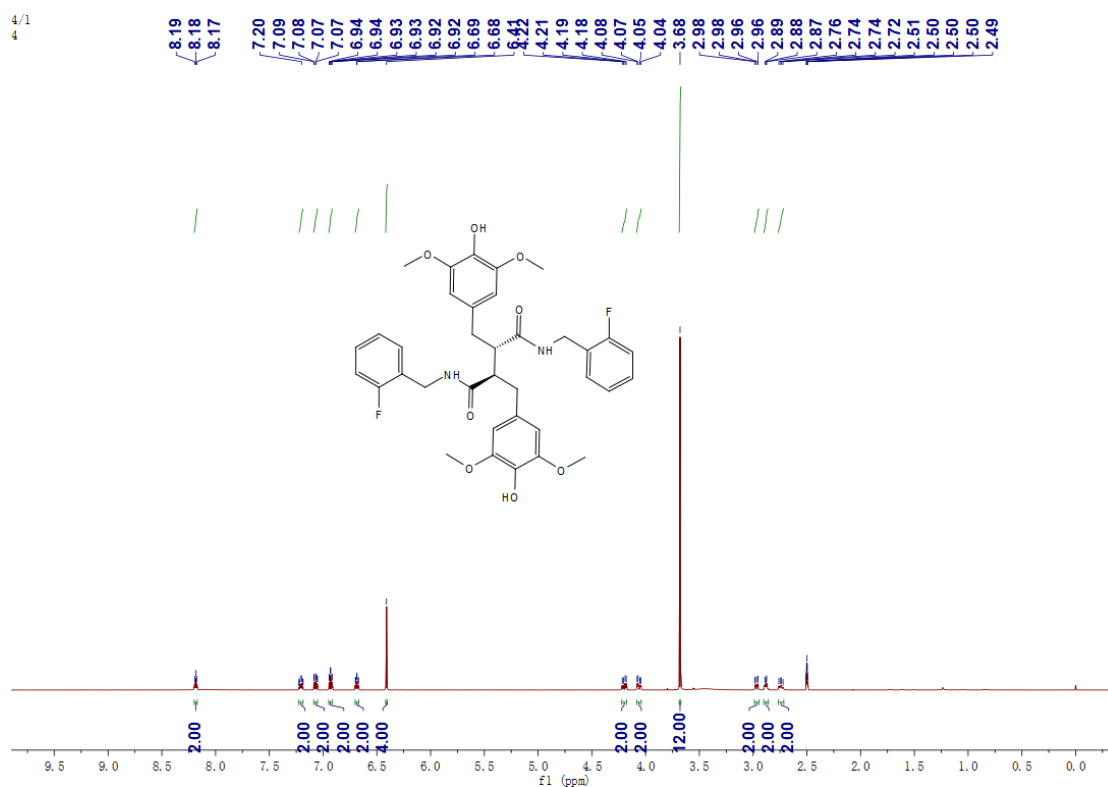

Figure S22. <sup>1</sup>H NMR spectrum of compound 10b

4/2  
4

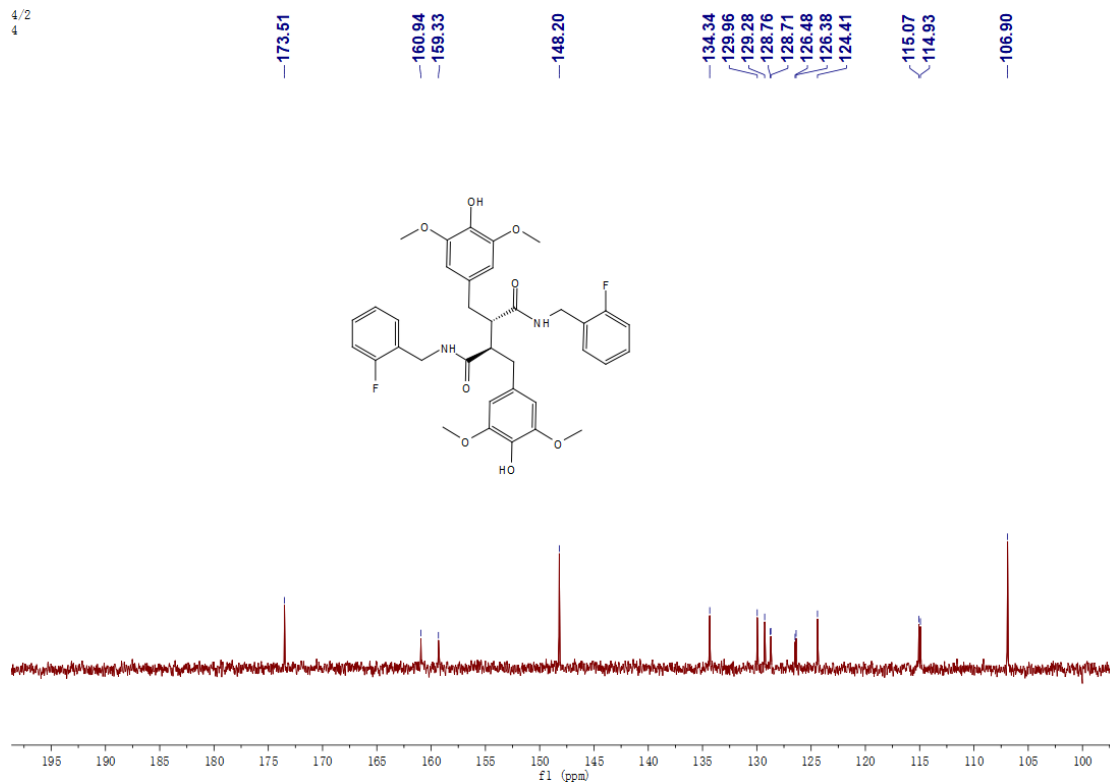

Figure S23. <sup>13</sup>C NMR spectrum of compound 10b

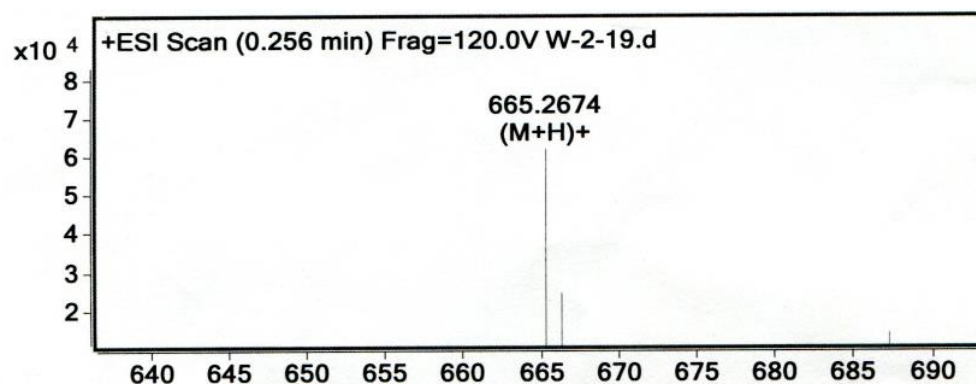

Figure S24. HRMS spectrum of compound 10b

## 10. <sup>1</sup>H NMR, <sup>13</sup>C NMR and HRMS spectrum of compound 10c

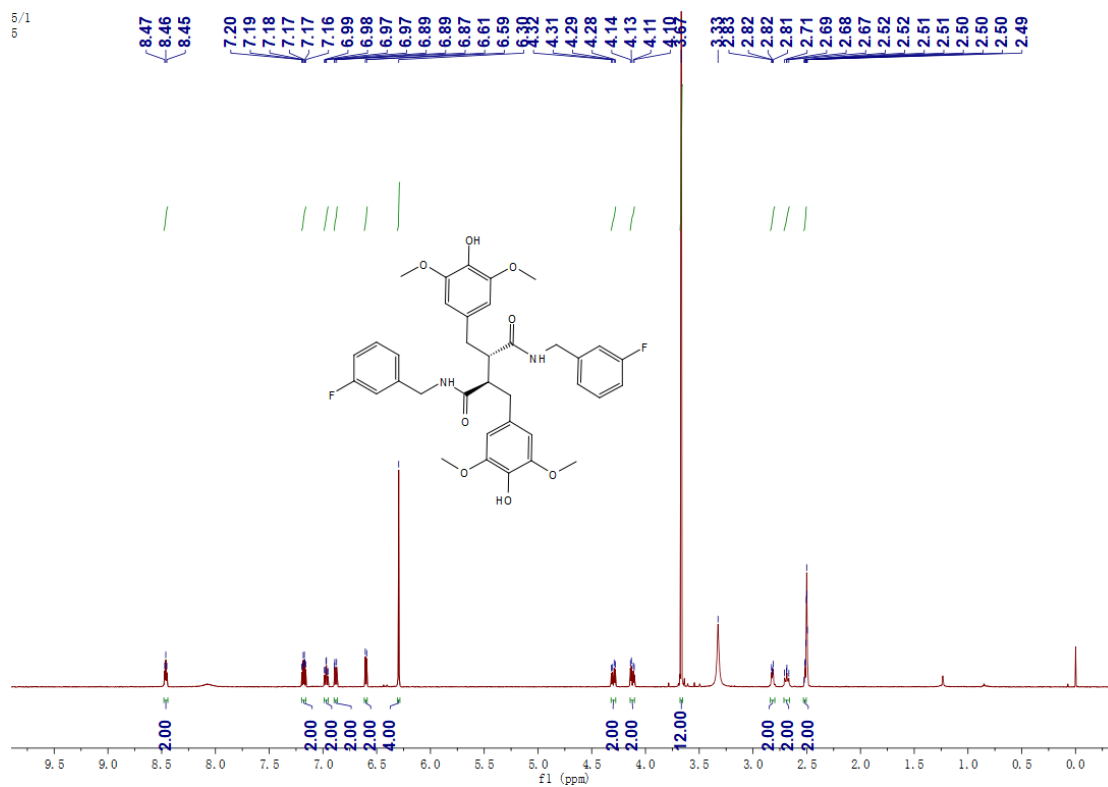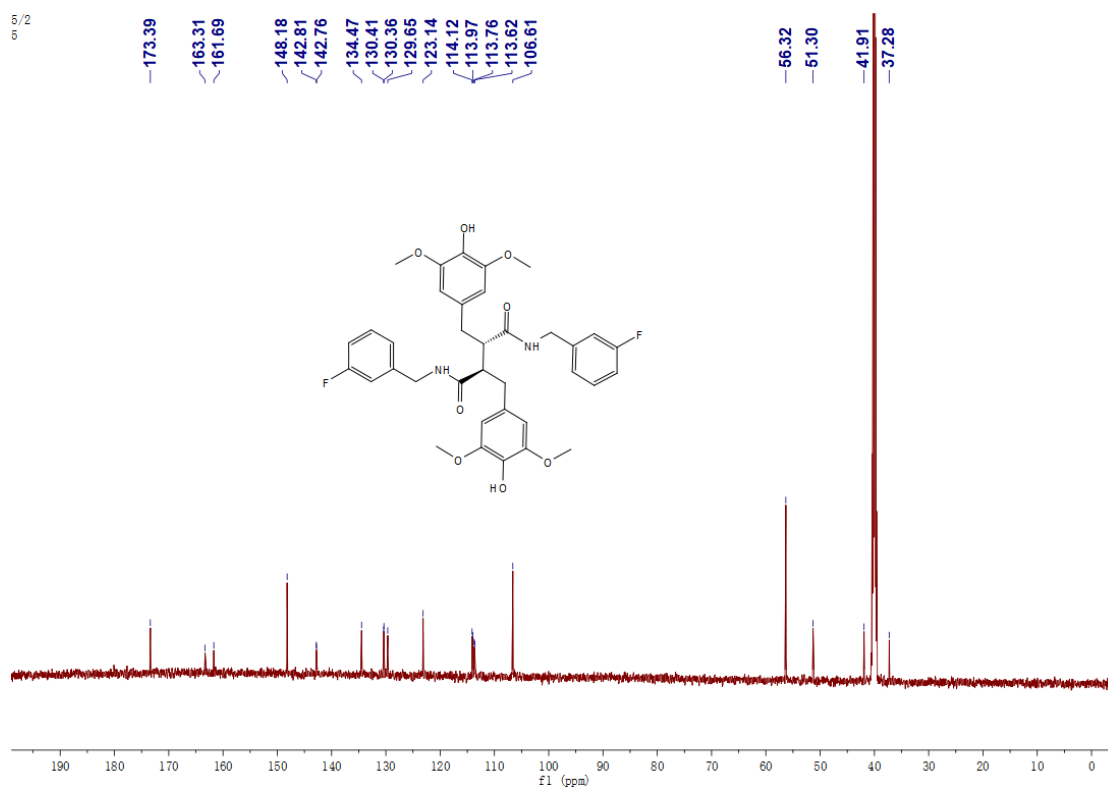



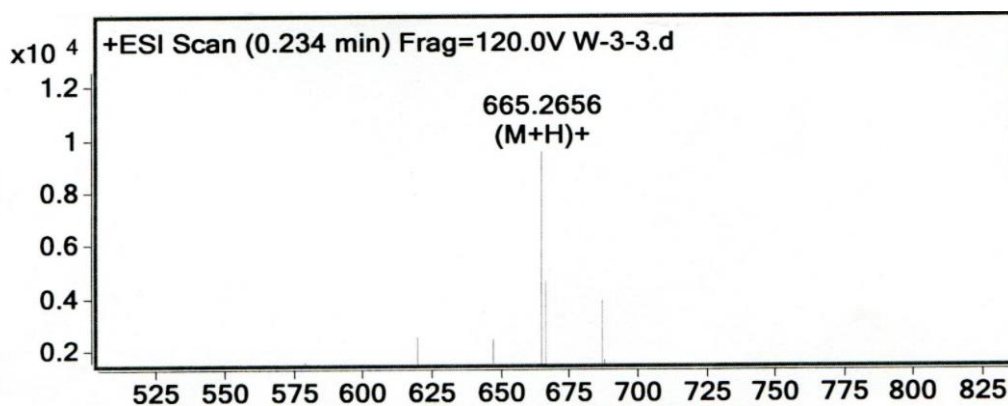

Figure S27. HRMS spectrum of compound 10c

11. <sup>1</sup>H NMR, <sup>13</sup>C NMR and HRMS spectrum of compound 10d

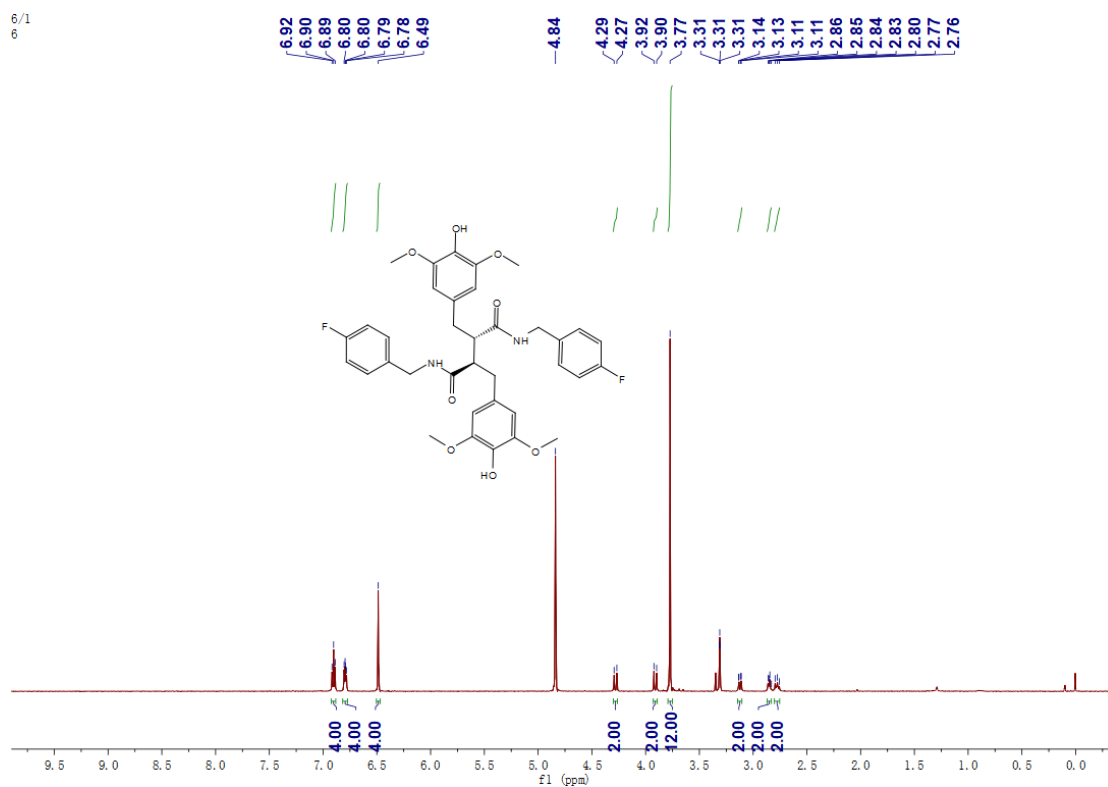

Figure S28. <sup>1</sup>H NMR spectrum of compound 10d

6/2  
6

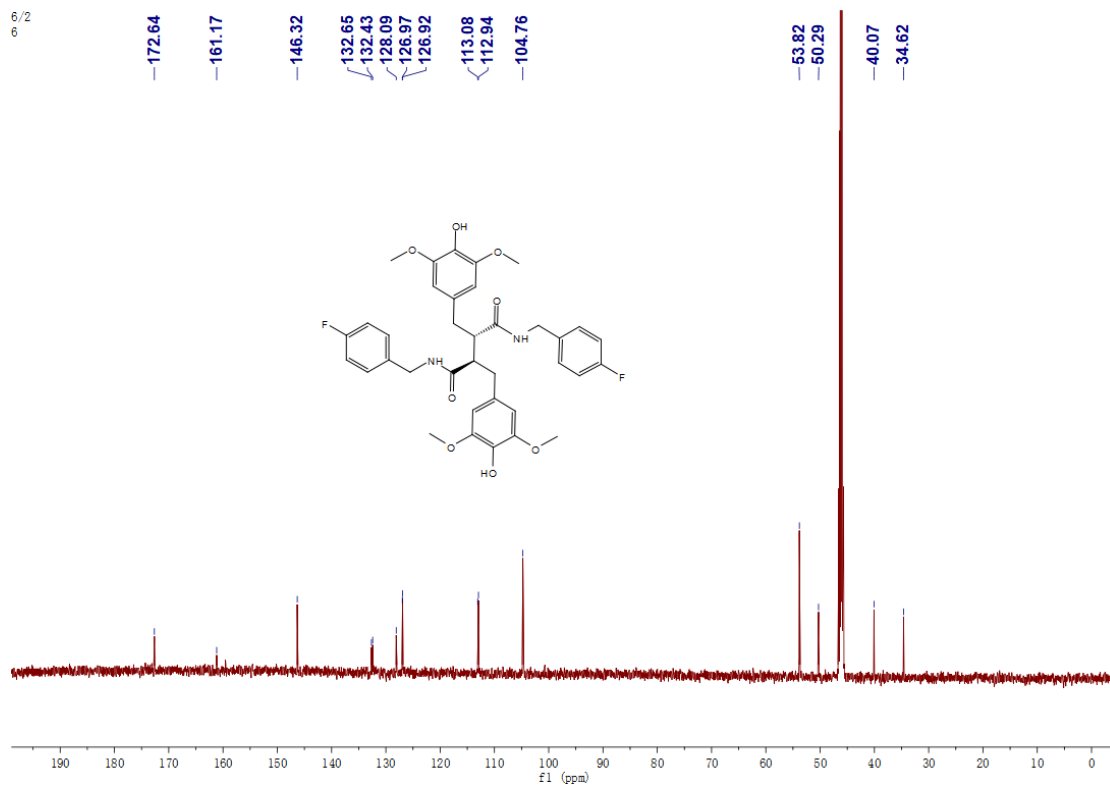

**Figure S29.** <sup>13</sup>C NMR spectrum of compound **10d**

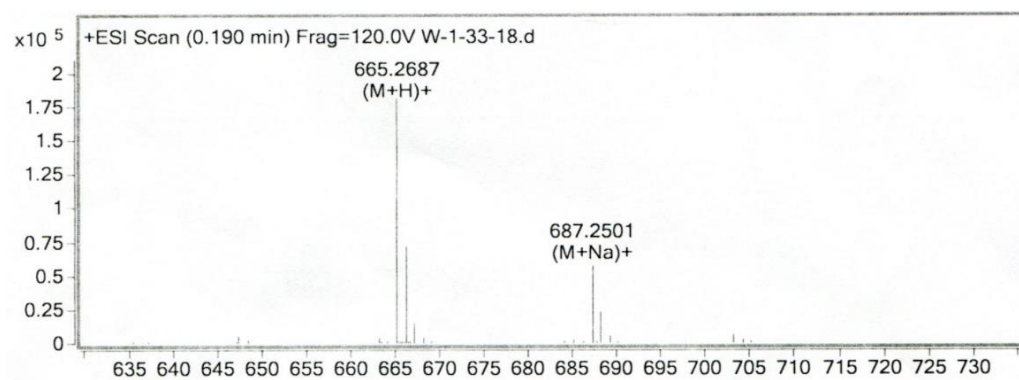

**Figure S30.** HRMS spectrum of compound **10d**

## 12. <sup>1</sup>H NMR, <sup>13</sup>C NMR and HRMS spectrum of compound 10e

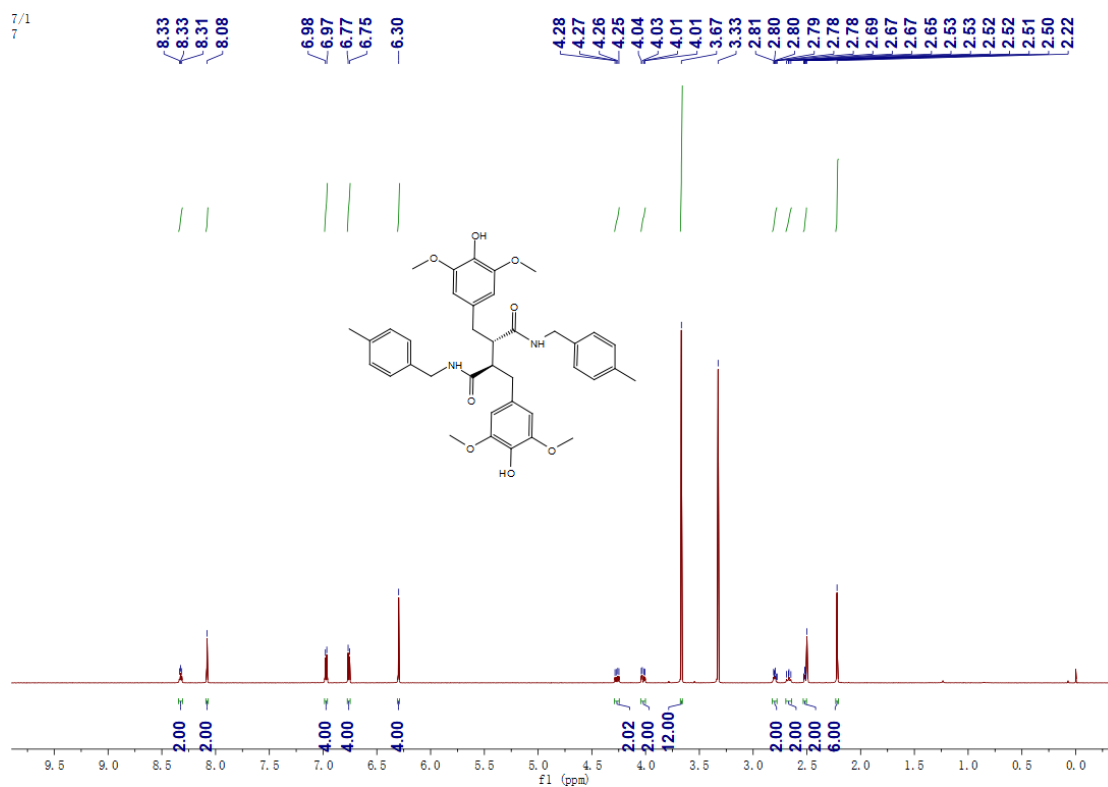

Figure S31. <sup>1</sup>H NMR spectrum of compound 10e

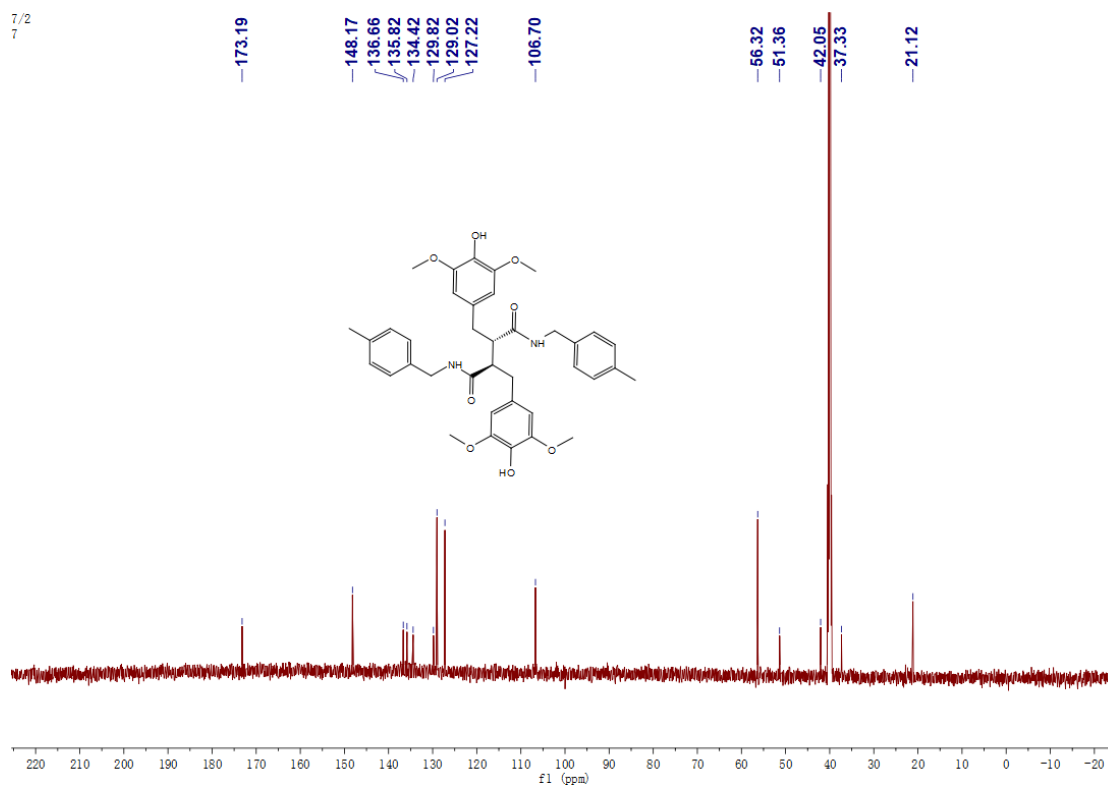

Figure S32. <sup>13</sup>C NMR spectrum of compound 10e

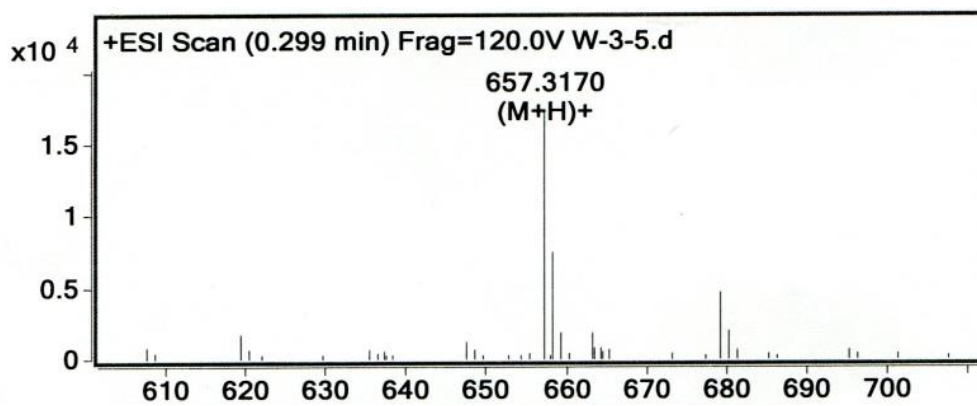

Figure S33. HRMS spectrum of compound 10e

13. <sup>1</sup>H NMR, <sup>13</sup>C NMR and HRMS spectrum of compound 10f

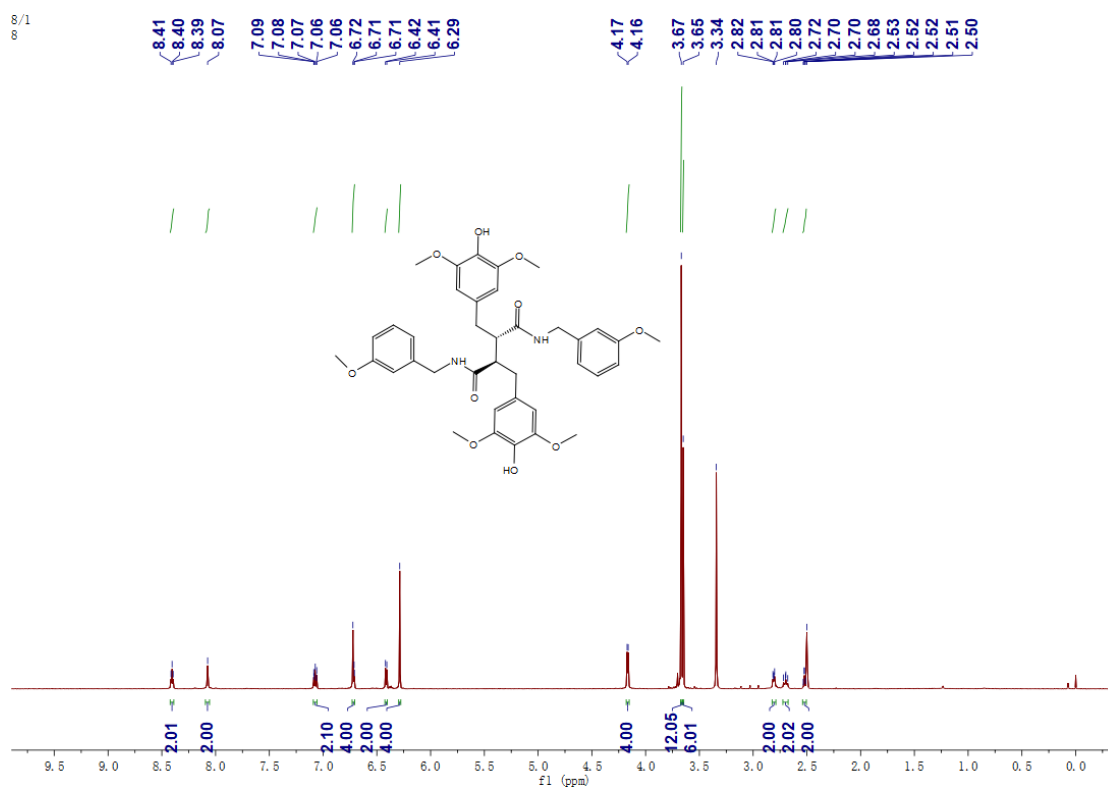

Figure S34. <sup>1</sup>H NMR spectrum of compound 10f

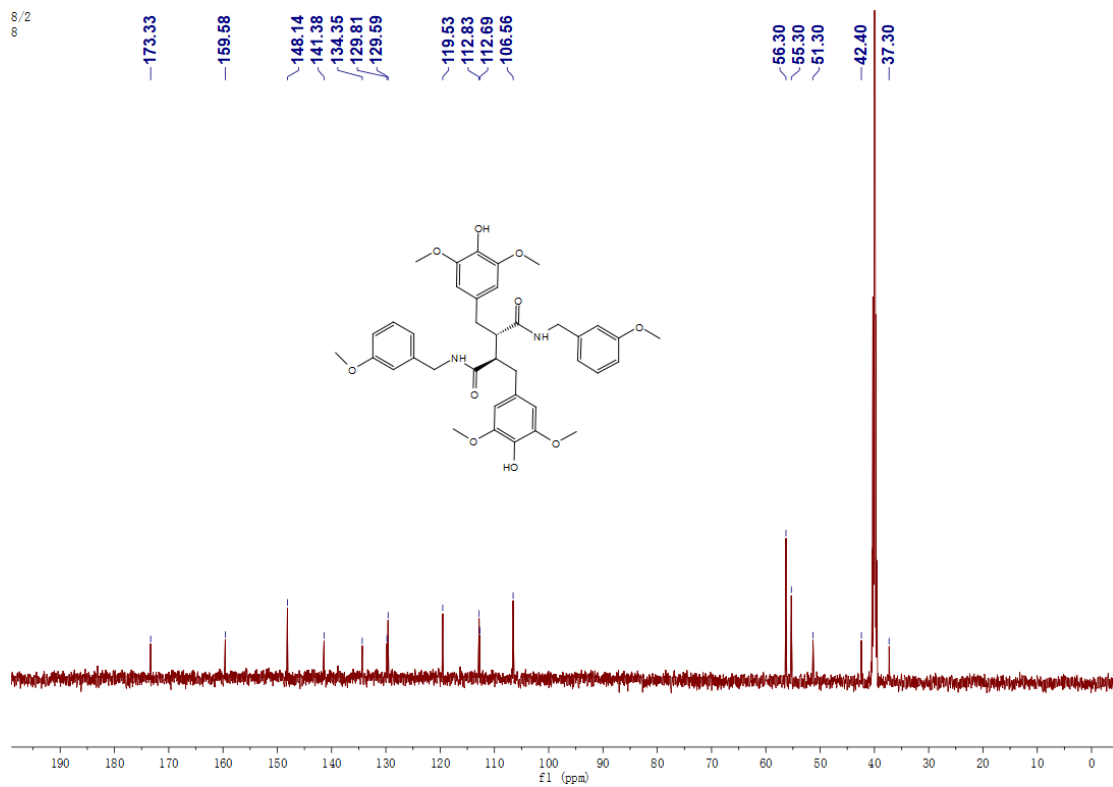

Figure S35 <sup>13</sup>C NMR spectrum of compound 10f

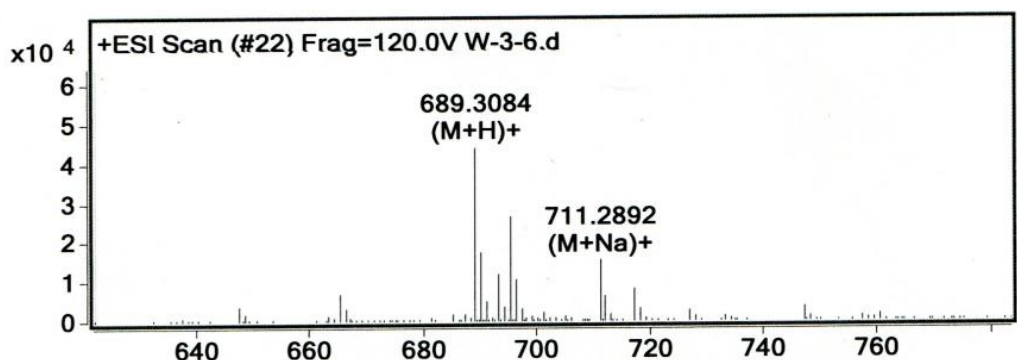

Figure S36 HRMS spectrum of compound 10f

# 14. <sup>1</sup>H NMR, <sup>13</sup>C NMR and HRMS spectrum of compound 10g

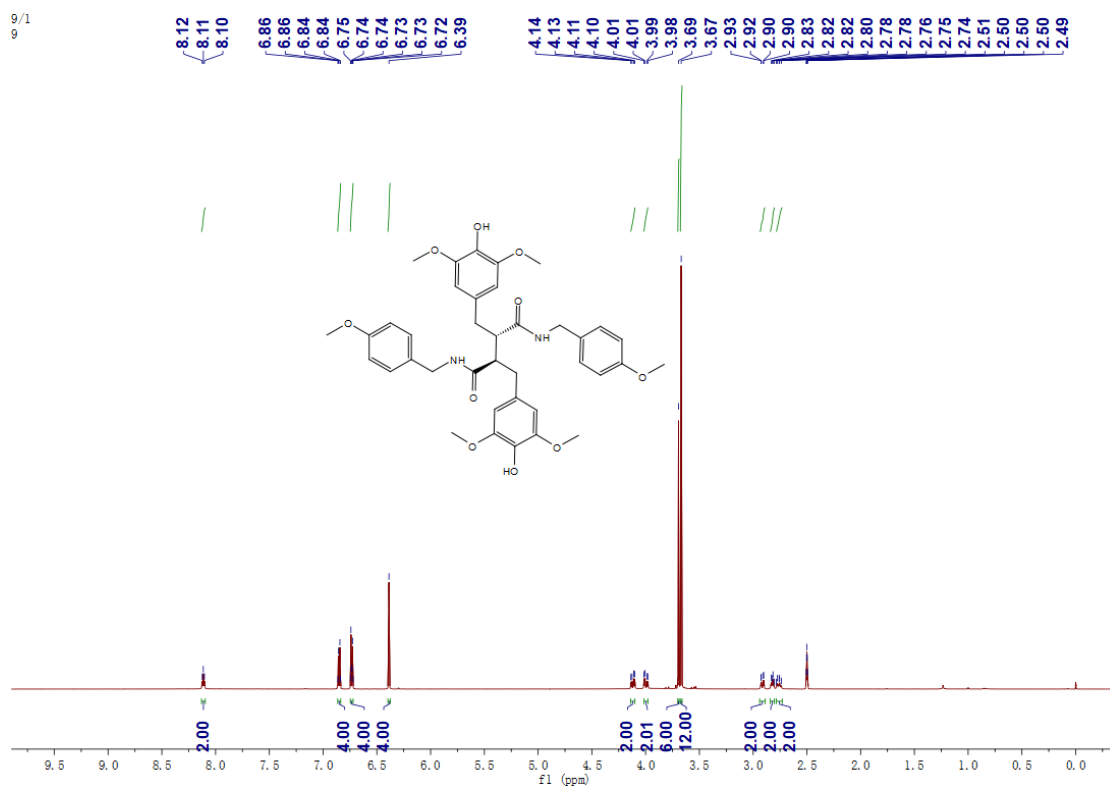

Figure S37 <sup>1</sup>H NMR spectrum of compound 10g

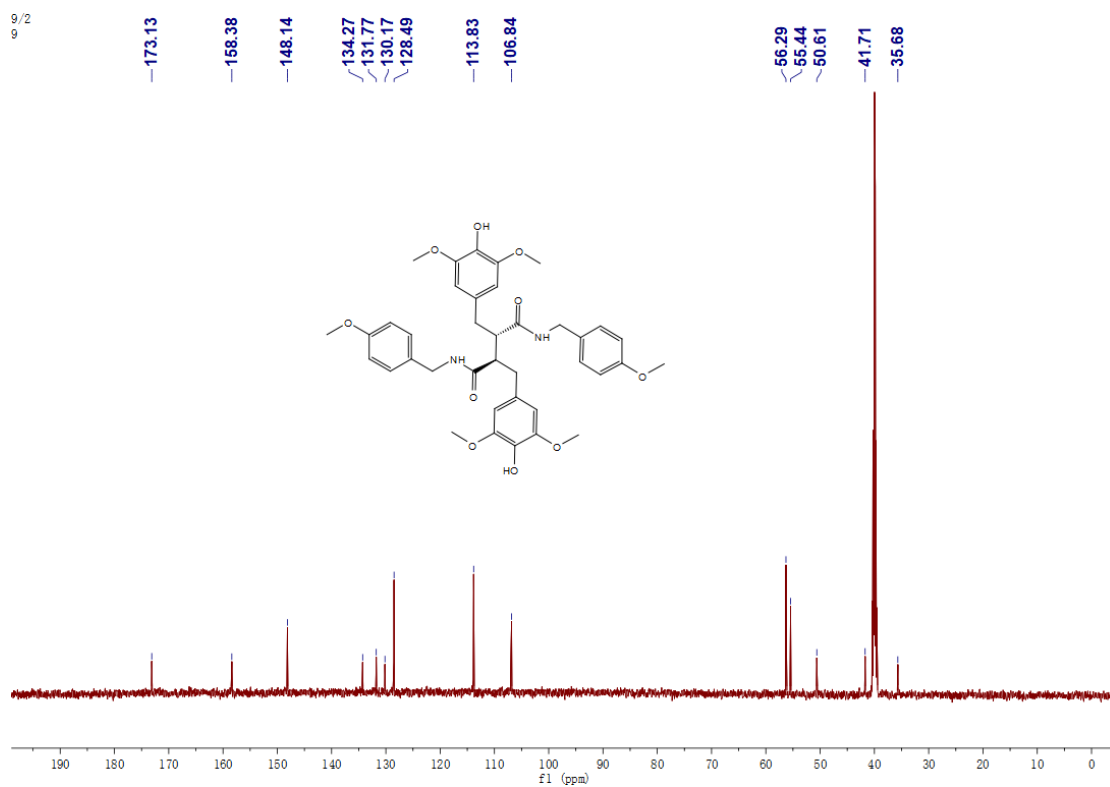

Figure S38 <sup>13</sup>C NMR spectrum of compound 10g

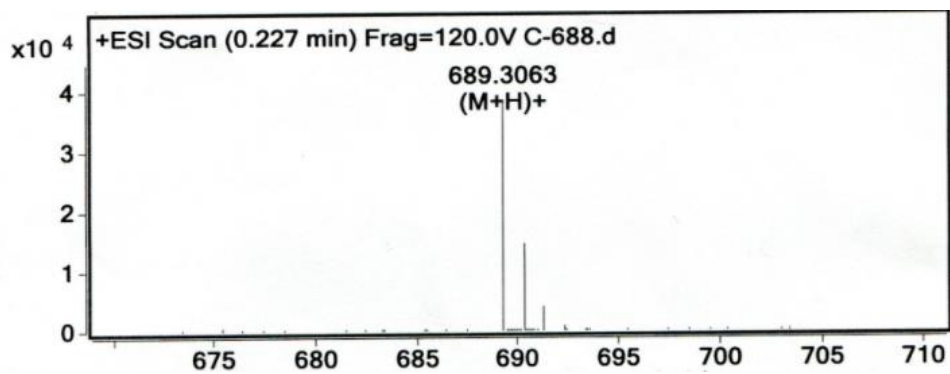

Figure S39 HRMS spectrum of compound 10g

15. <sup>1</sup>H NMR, <sup>13</sup>C NMR, <sup>19</sup>F NMR and HRMS spectrum of compound 10h

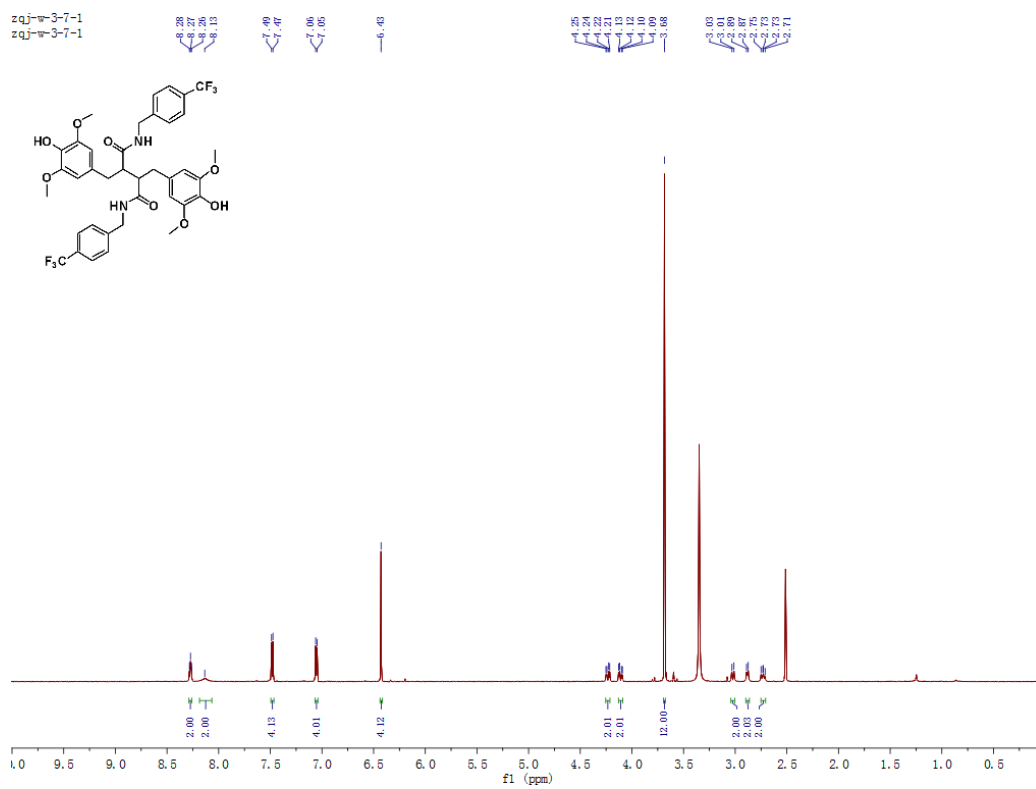

Figure S40 <sup>1</sup>H NMR spectrum of compound 10h

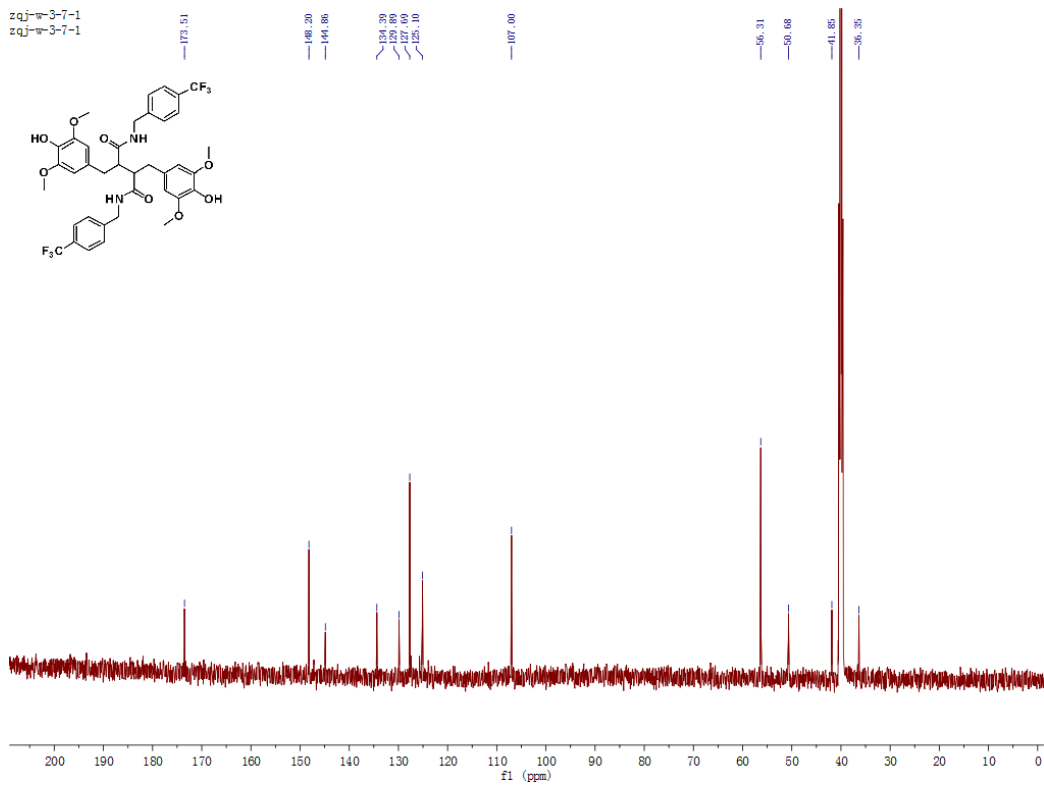

Figure S41  $^{13}\text{C}$  NMR spectrum of compound **10h**

S217-3

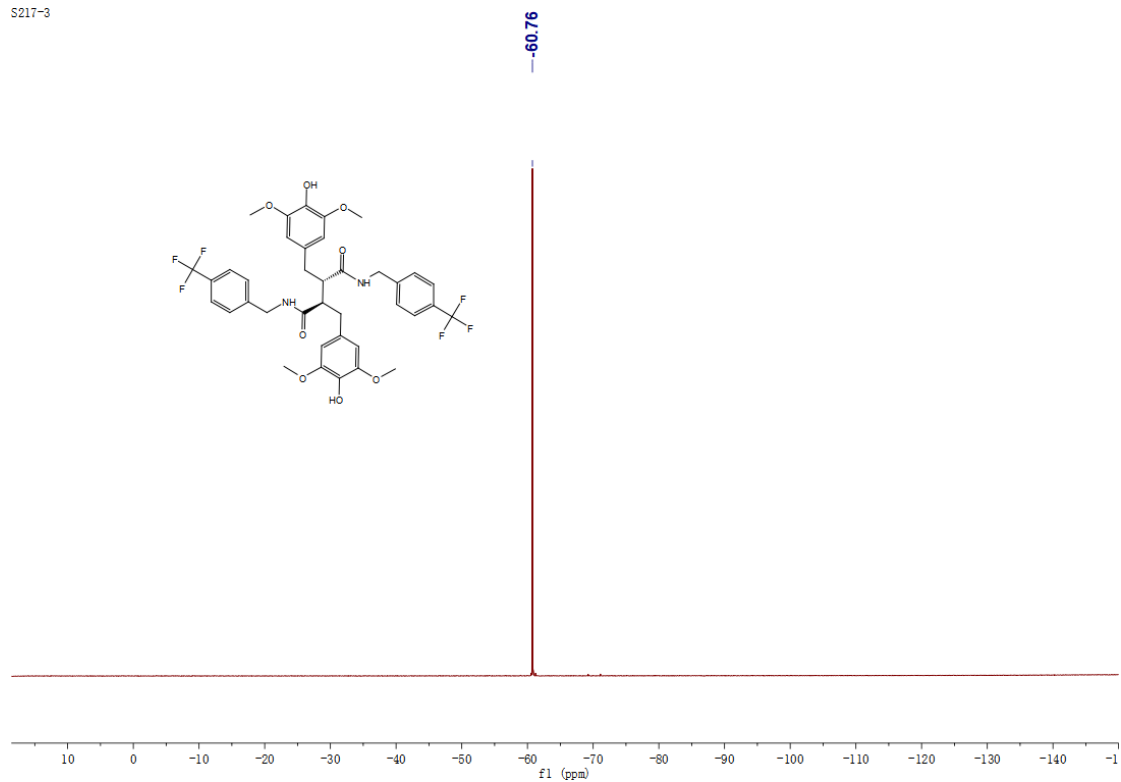

Figure S42  $^{19}\text{F}$  NMR spectrum of compound **10h**



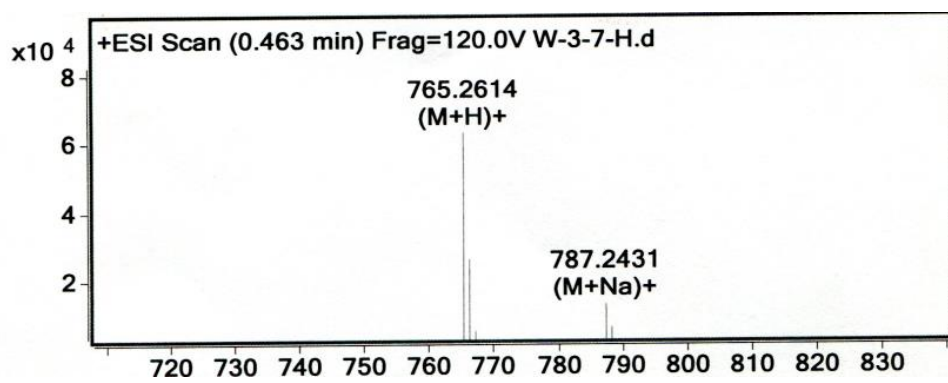

Figure S43 HRMS spectrum of compound 10h

16. <sup>1</sup>H NMR, <sup>13</sup>C NMR and HRMS spectrum of compound 10i

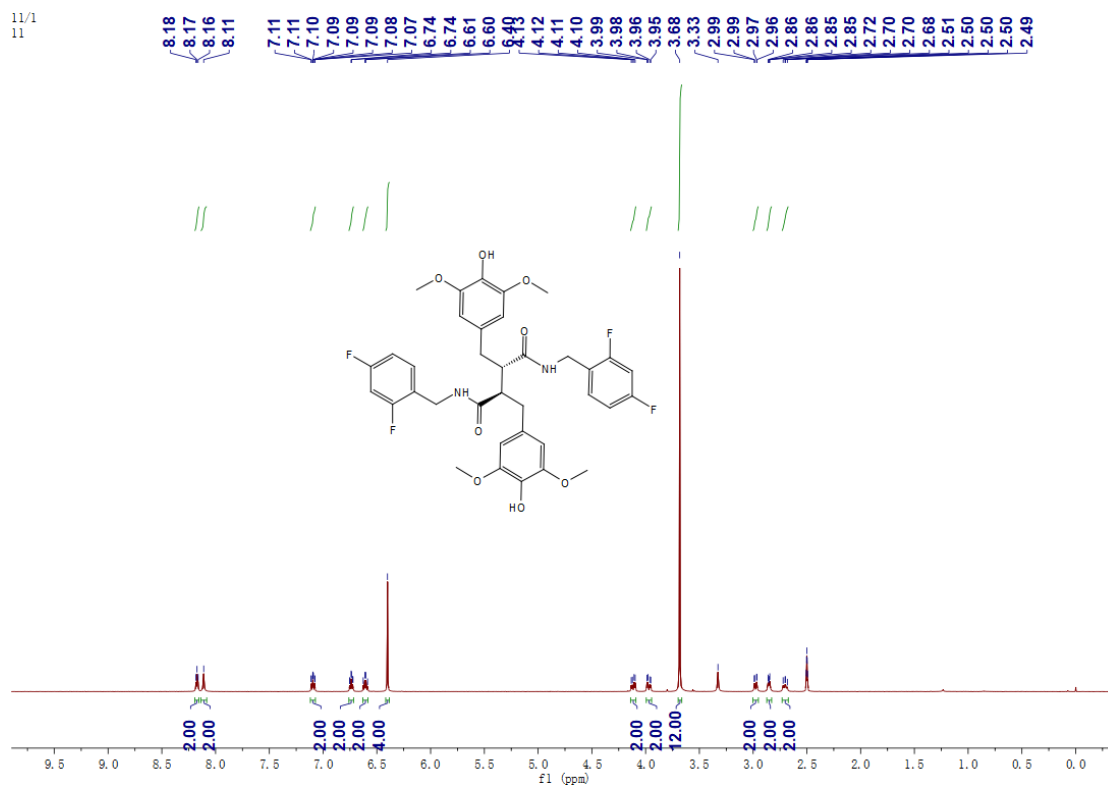

Figure S44 <sup>1</sup>H NMR spectrum of compound 10i

11/2  
11

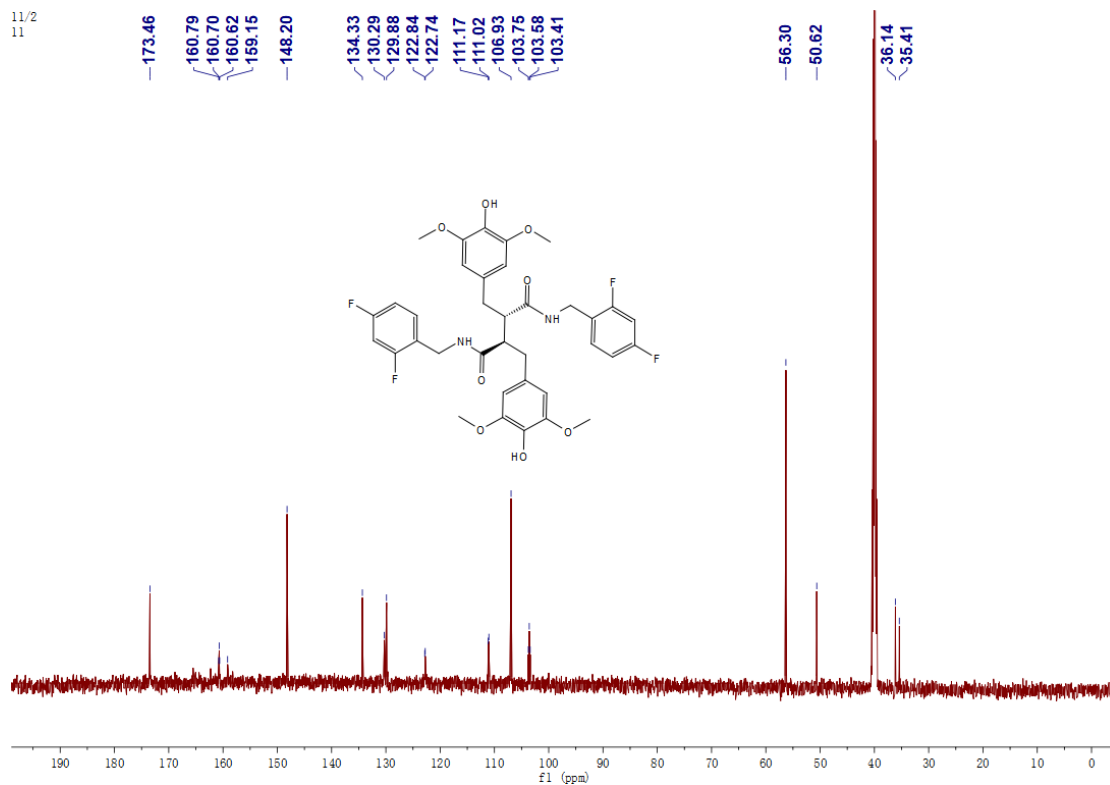

Figure S45 <sup>13</sup>C NMR spectrum of compound 10i

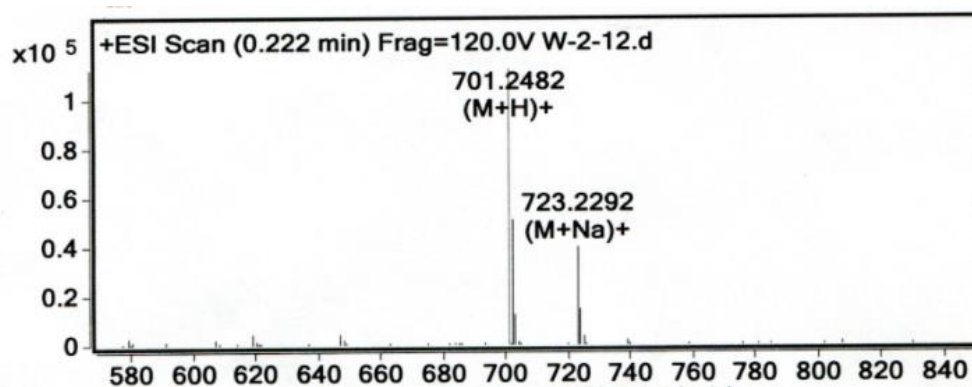

Figure S46 HRMS spectrum of compound 10i

## 17. <sup>1</sup>H NMR, <sup>13</sup>C NMR and HRMS spectrum of compound 10j

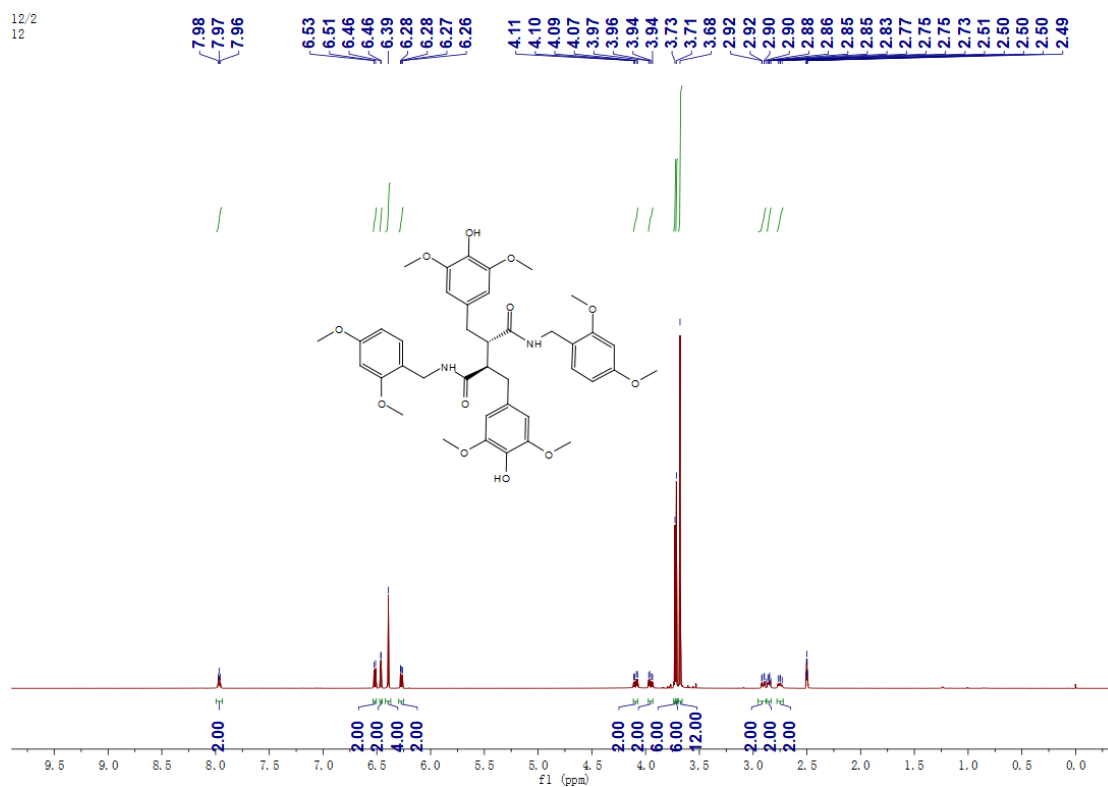

Figure S47 <sup>1</sup>H NMR spectrum of compound 10j

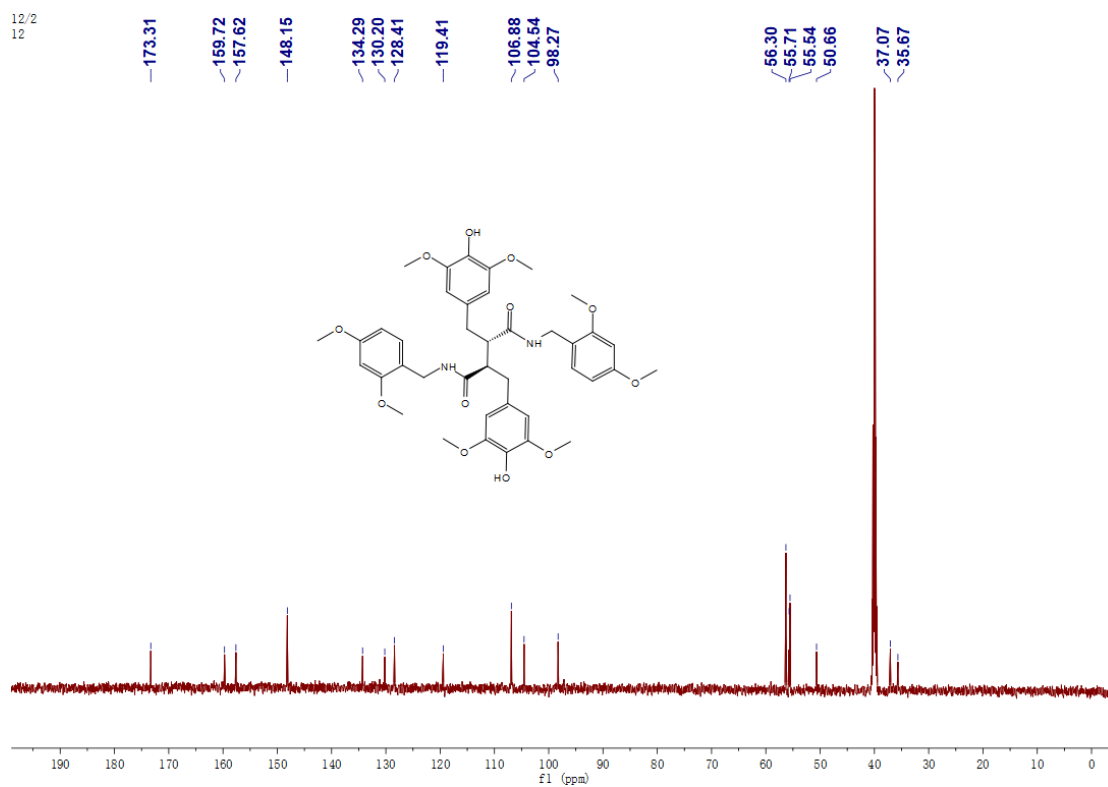

Figure S48 <sup>13</sup>C NMR spectrum of compound 10j

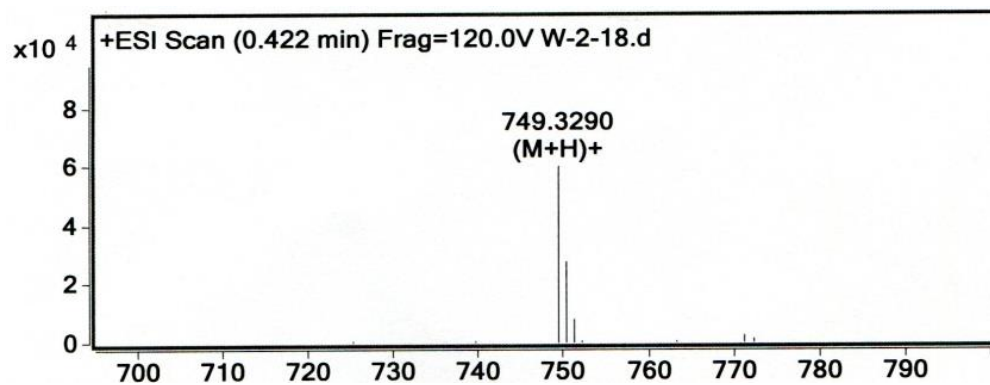

Figure S49 HRMS spectrum of compound 10j

18. <sup>1</sup>H NMR, <sup>13</sup>C NMR and HRMS spectrum of compound 10k

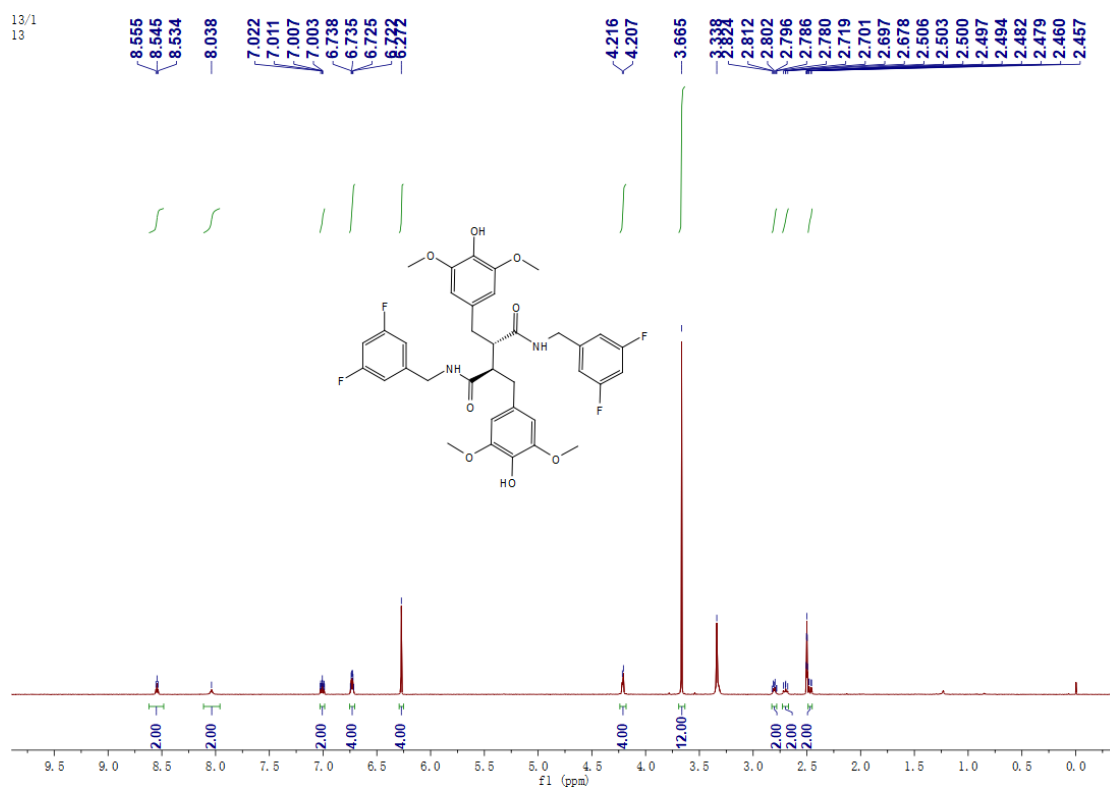

Figure S50 <sup>1</sup>H NMR spectrum of compound 10k

13/2  
13

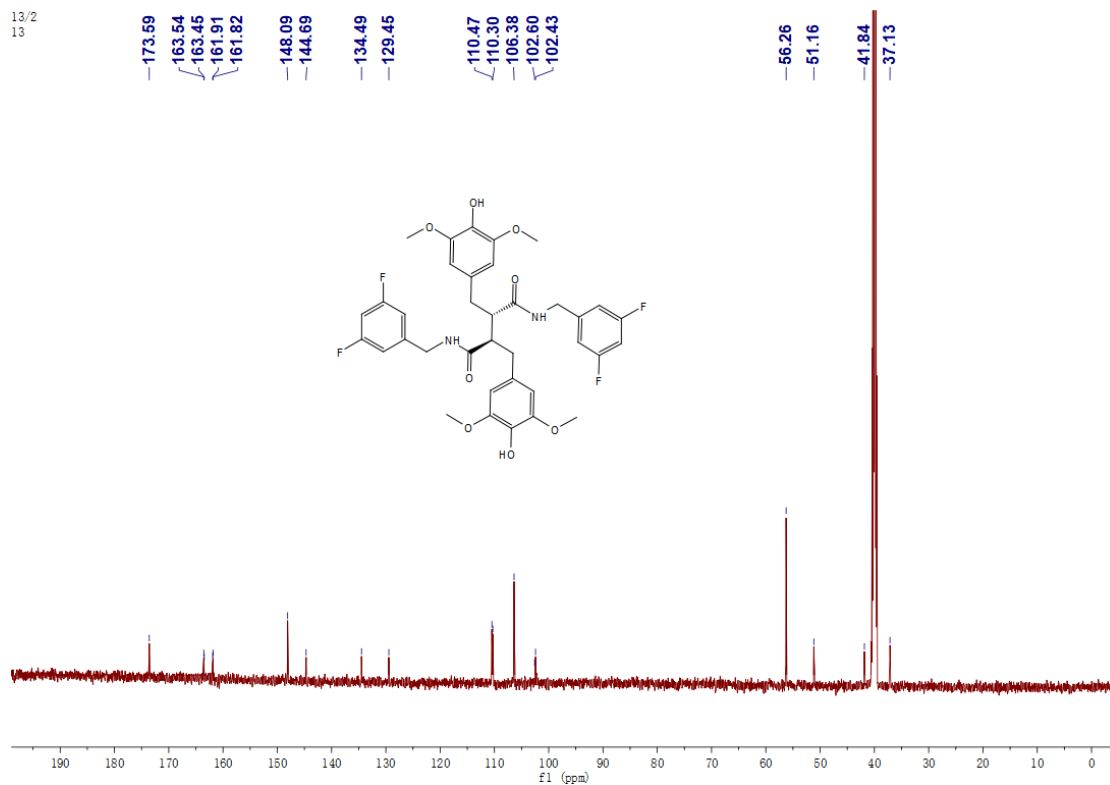

Figure S51 <sup>13</sup>C NMR spectrum of compound 10k

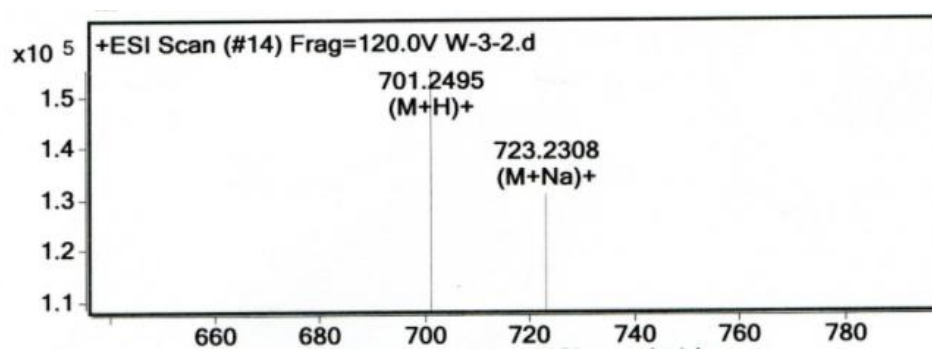

Figure S52 HRMS spectrum of compound 10k

## 19. $^1\text{H}$ NMR, $^{13}\text{C}$ NMR and HRMS spectrum of compound 101

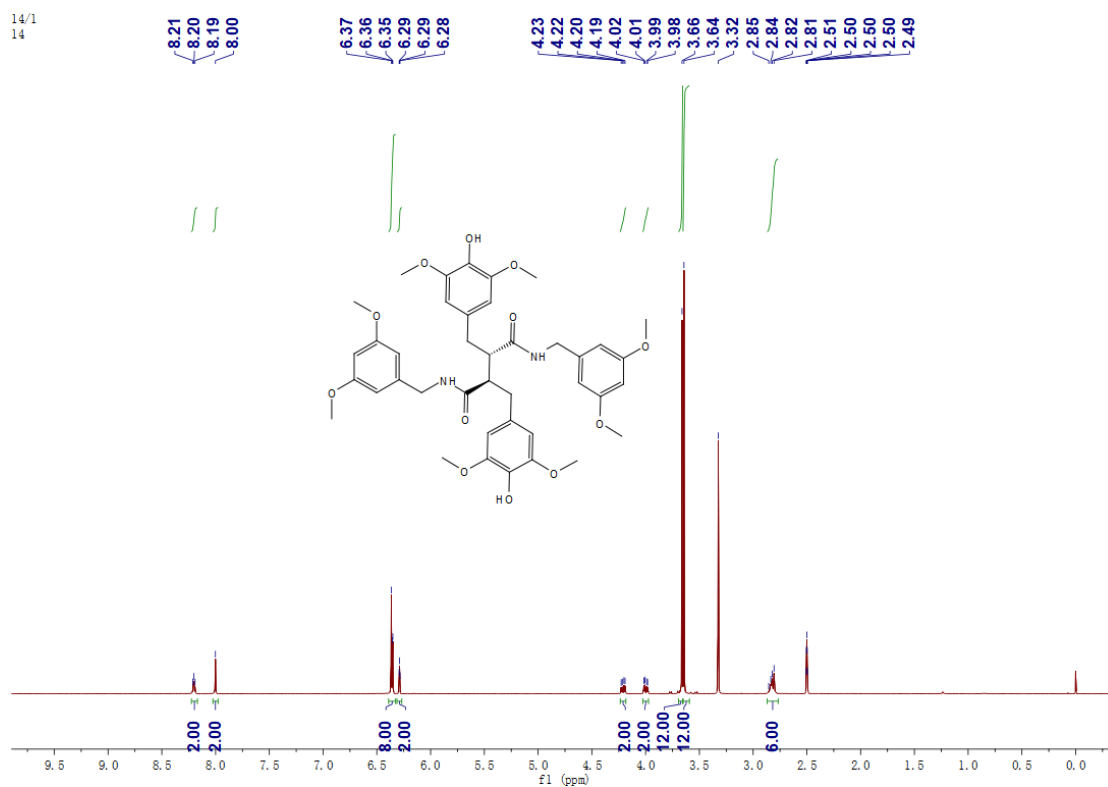

Figure S53  $^1\text{H}$  NMR spectrum of compound 101

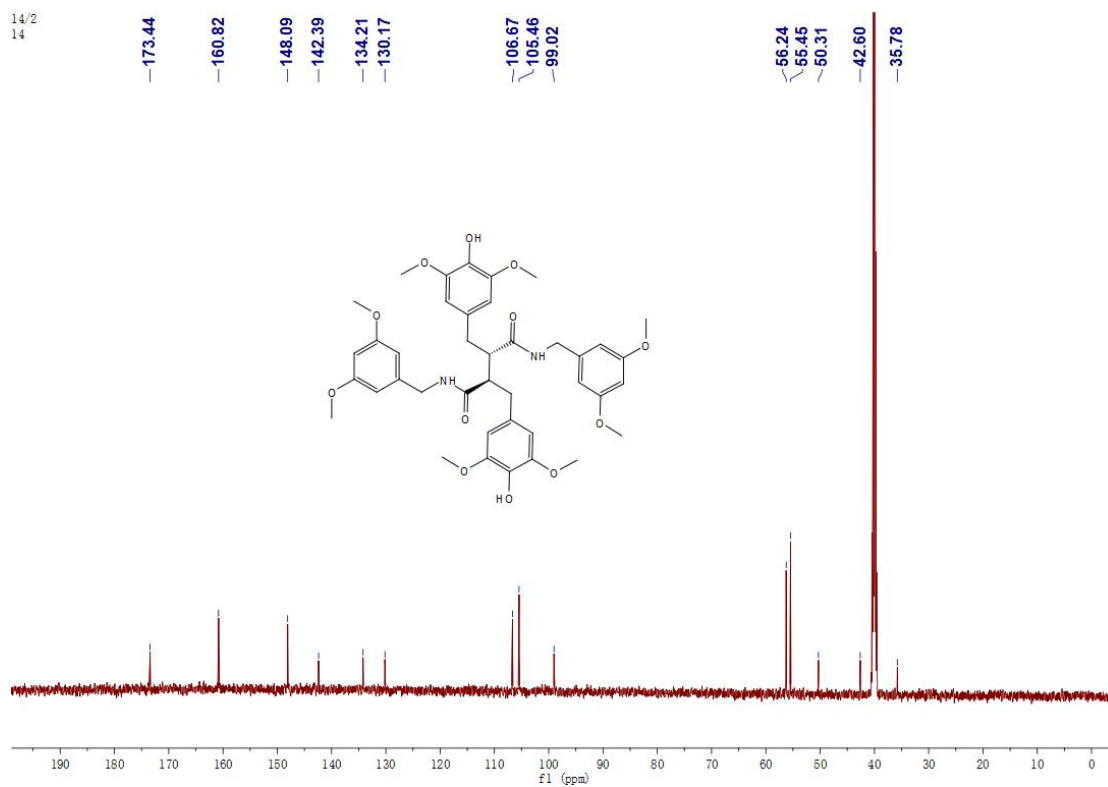

Figure S54  $^{13}\text{C}$  NMR spectrum of compound 101

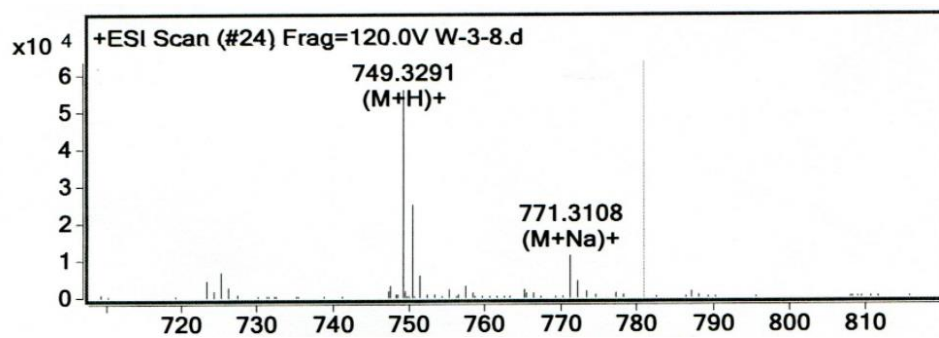

Figure S55 HRMS spectrum of compound 10l

20. <sup>1</sup>H NMR, <sup>13</sup>C NMR and HRMS spectrum of compound 10m

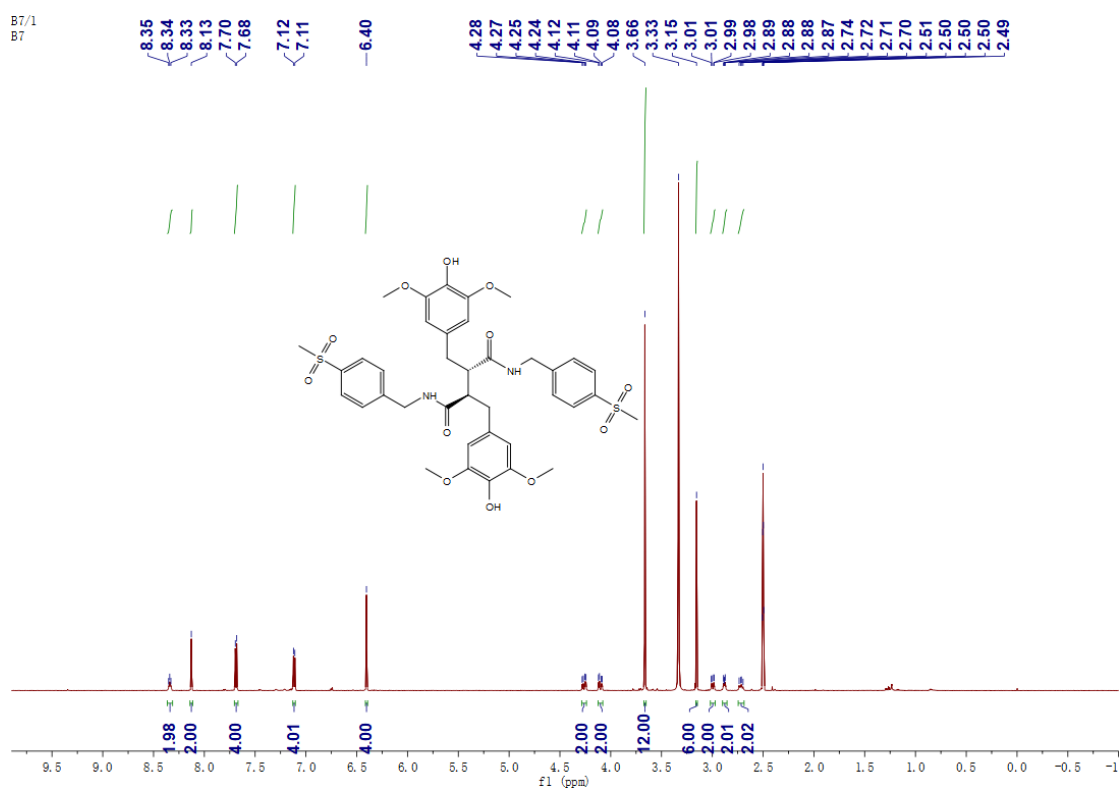

Figure S56 <sup>1</sup>H NMR spectrum of compound 10m

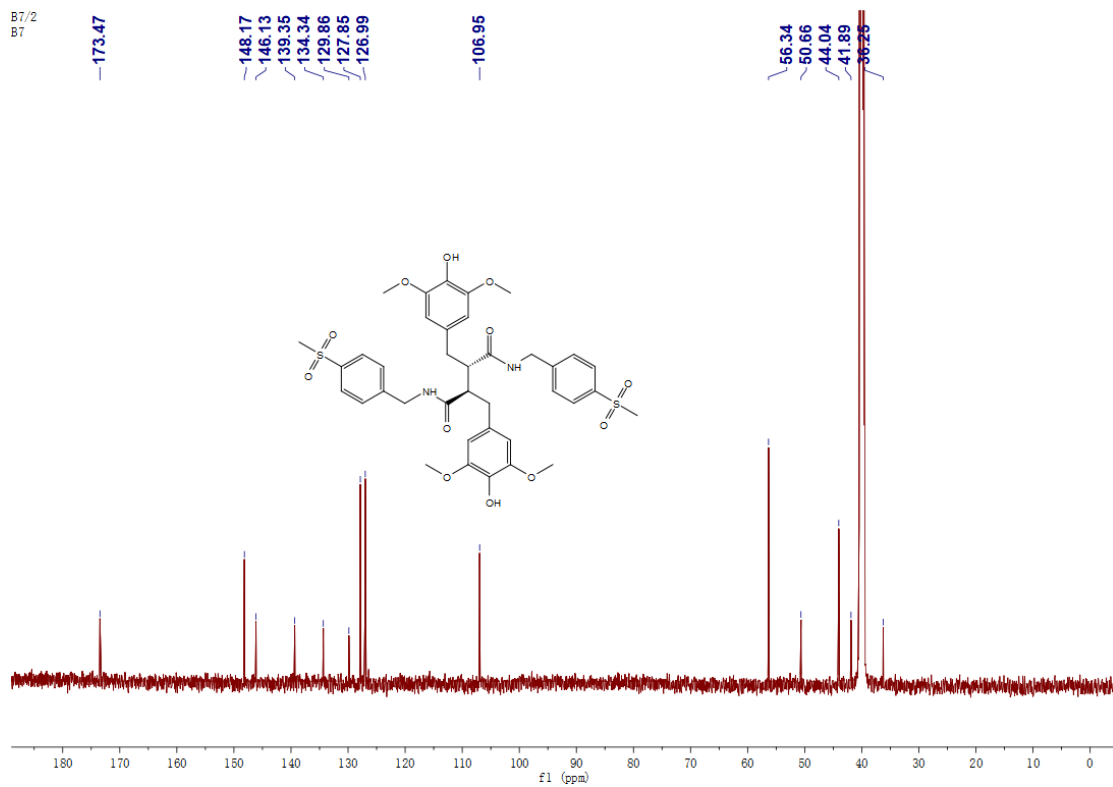

**Figure S57**  $^{13}\text{C}$  NMR spectrum of compound **10m**

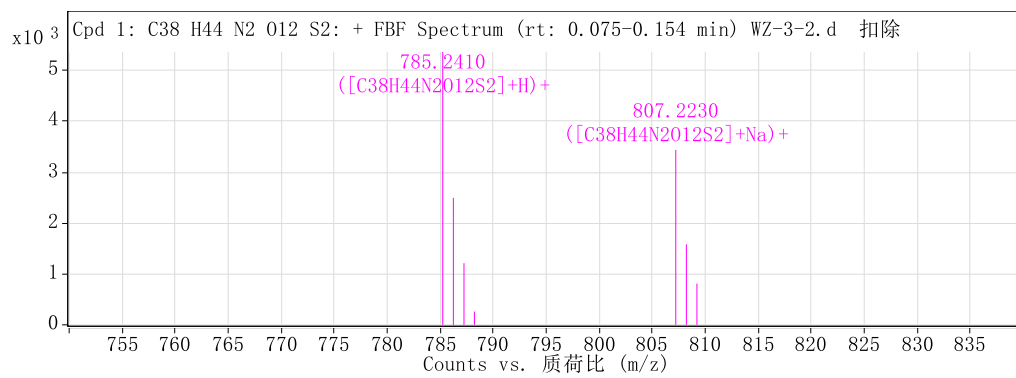

**Figure S58** HRMS spectrum of compound **10m**



## 21. $^1\text{H}$ NMR, $^{13}\text{C}$ NMR and HRMS spectrum of compound 10n

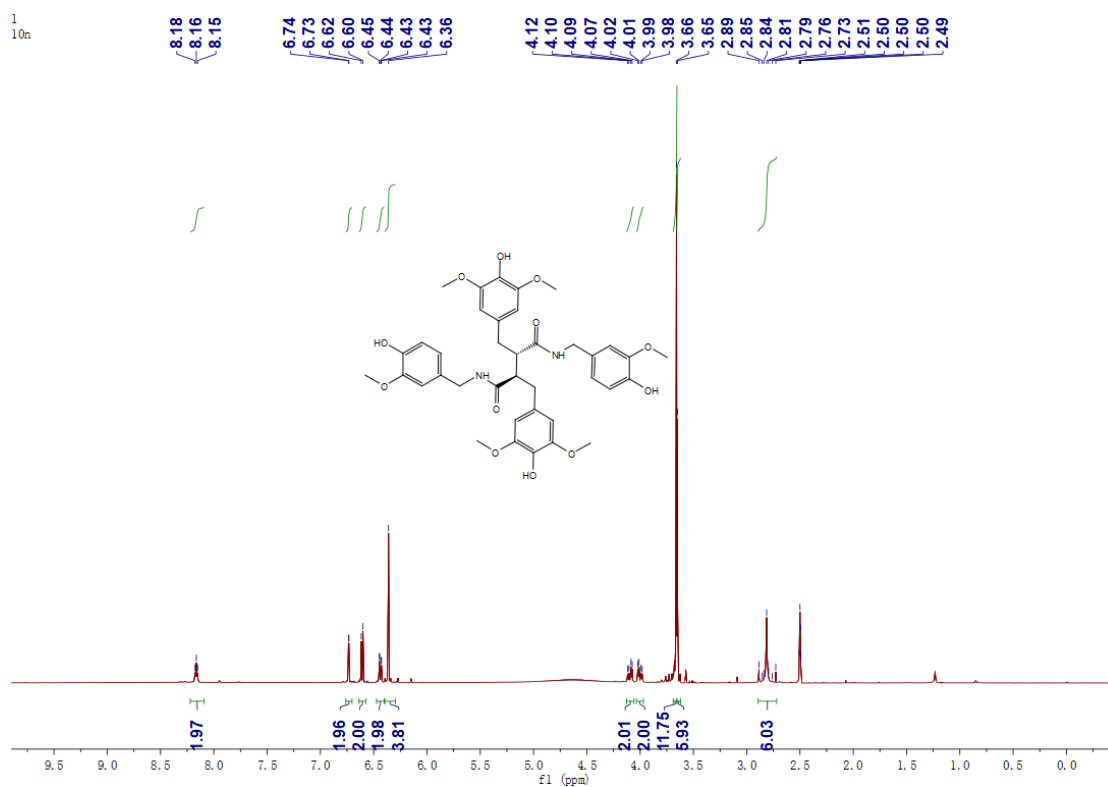

Figure S59  $^1\text{H}$  NMR spectrum of compound 10n

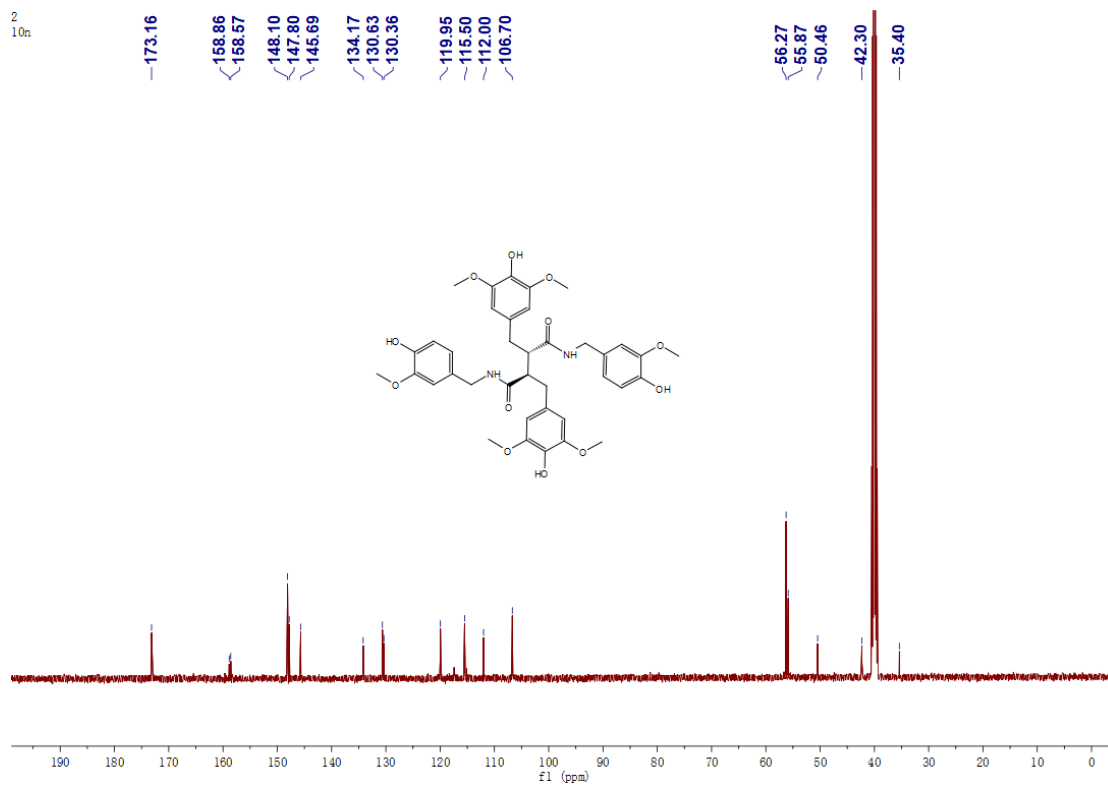

Figure S60  $^{13}\text{C}$  NMR spectrum of compound 10n

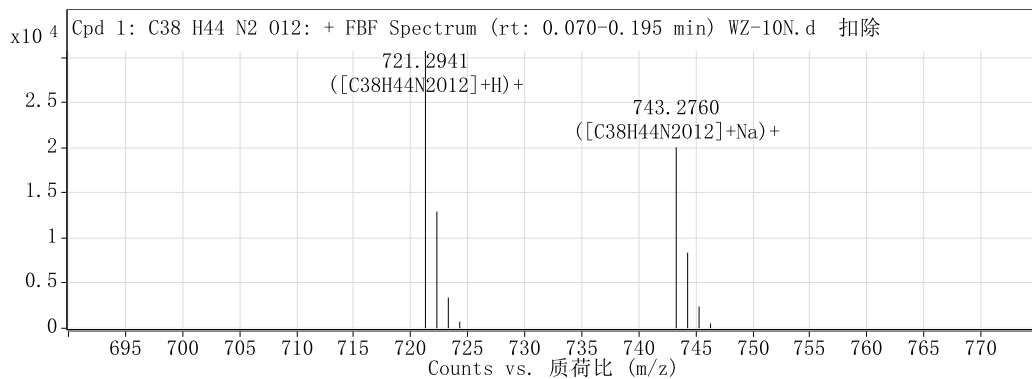

Figure S61 HRMS spectrum of compound 10n

22. <sup>1</sup>H NMR, <sup>13</sup>C NMR and HRMS spectrum of compound 12a

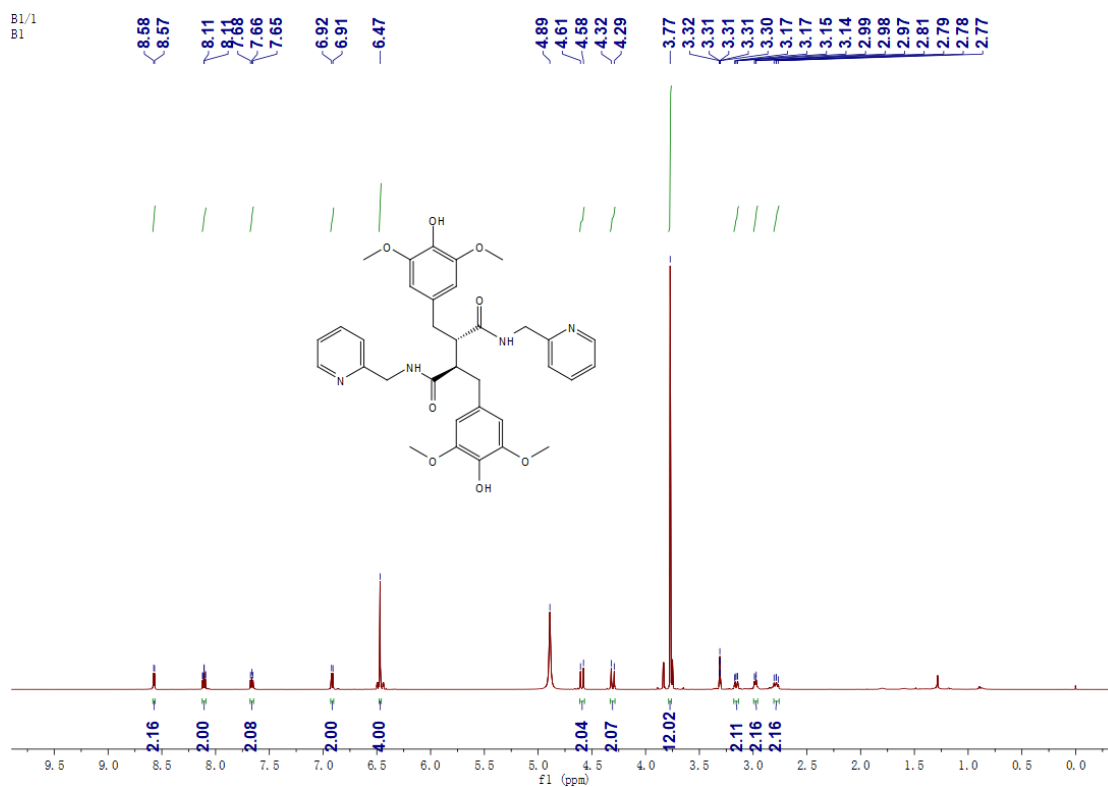

Figure S62 <sup>1</sup>H NMR spectrum of compound 12a

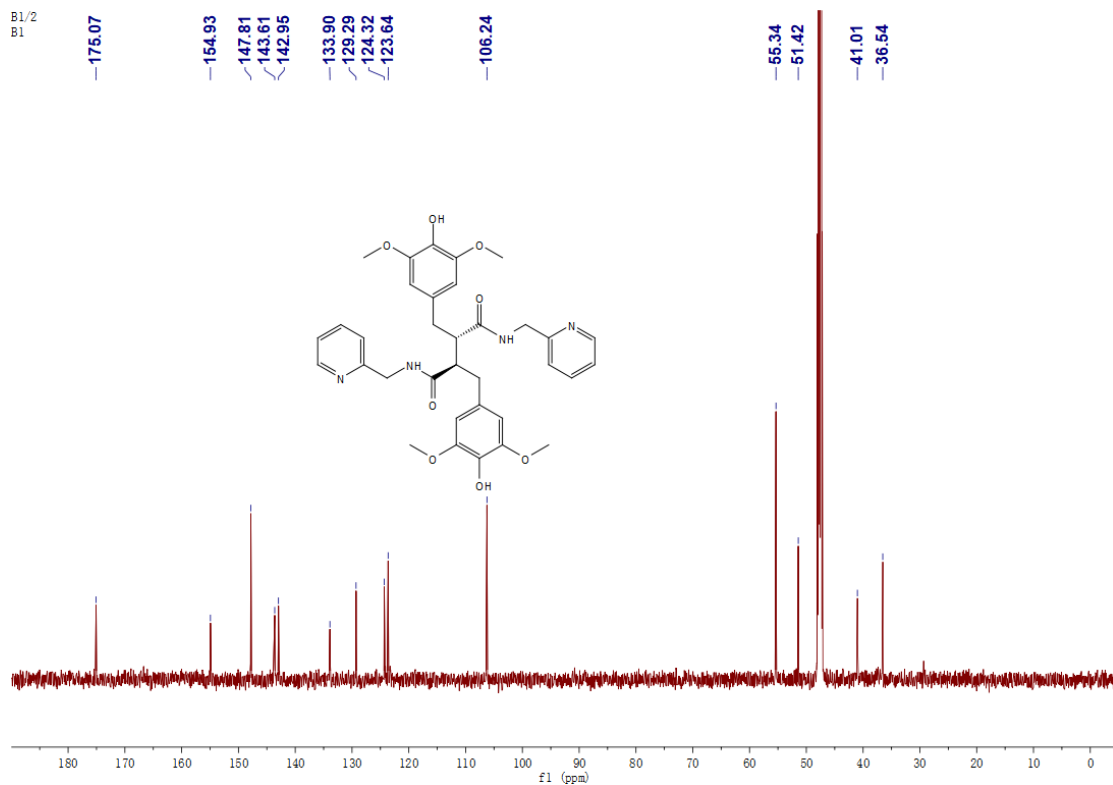

**Figure S63**  $^{13}\text{C}$  NMR spectrum of compound **12a**

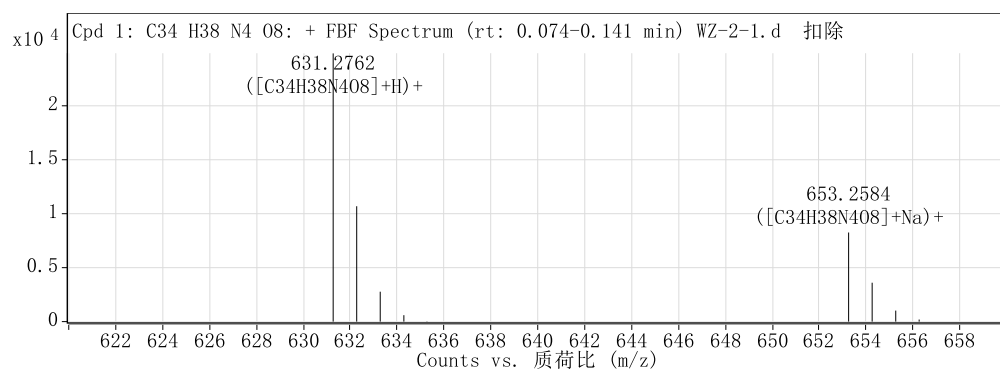

**Figure S64** HRMS spectrum of compound **12a**

### 23. $^1\text{H}$ NMR, $^{13}\text{C}$ NMR and HRMS spectrum of compound 12b

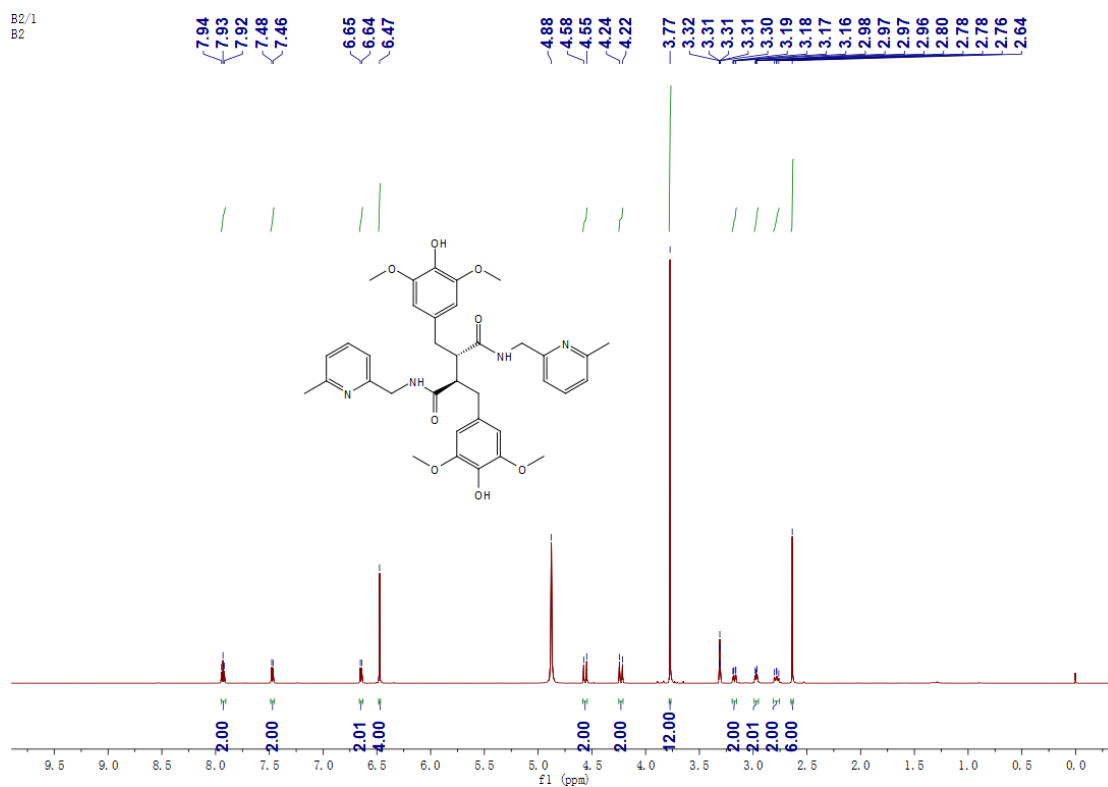

Figure S65  $^1\text{H}$  NMR spectrum of compound 12b

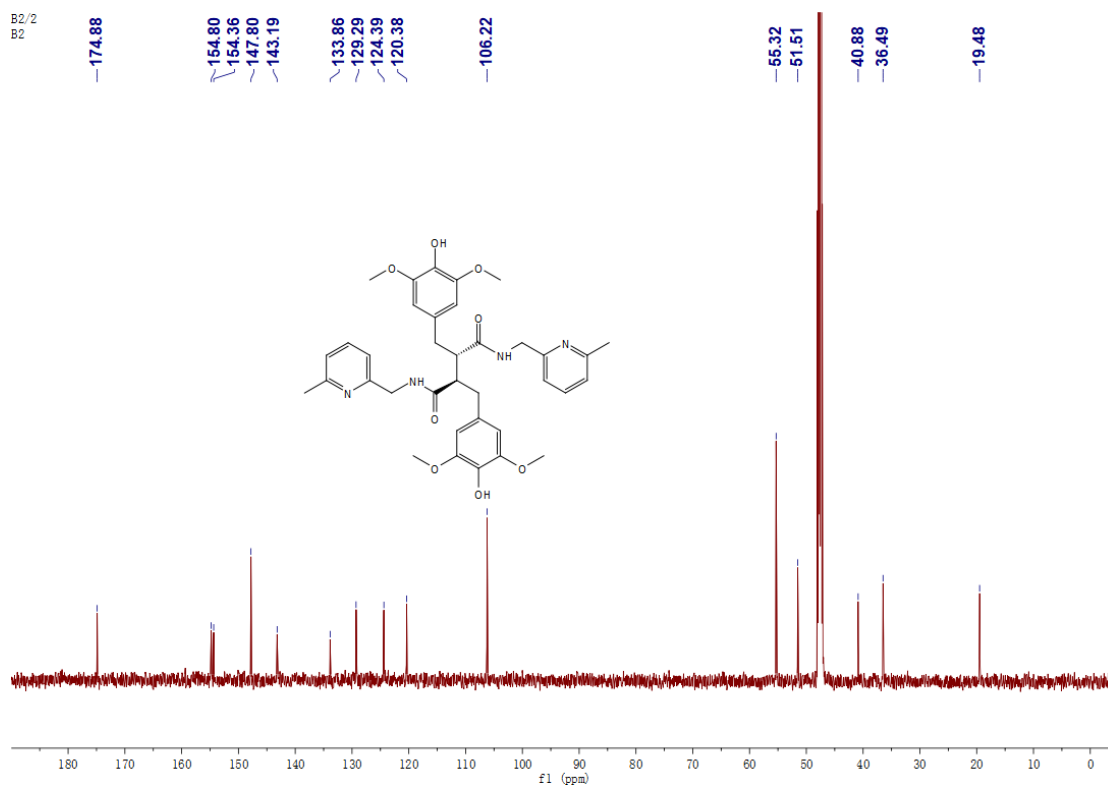

Figure S66  $^{13}\text{C}$  NMR spectrum of compound 12b

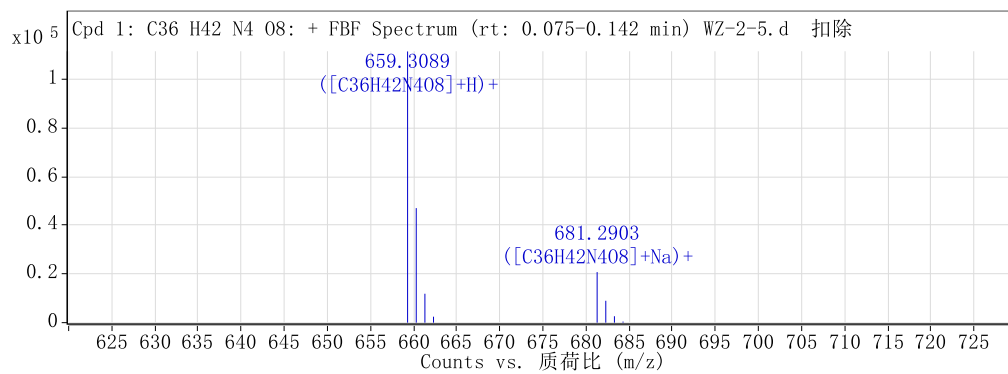

Figure S67 HRMS spectrum of compound 12b

24. <sup>1</sup>H NMR, <sup>13</sup>C NMR and HRMS spectrum of compound 12c

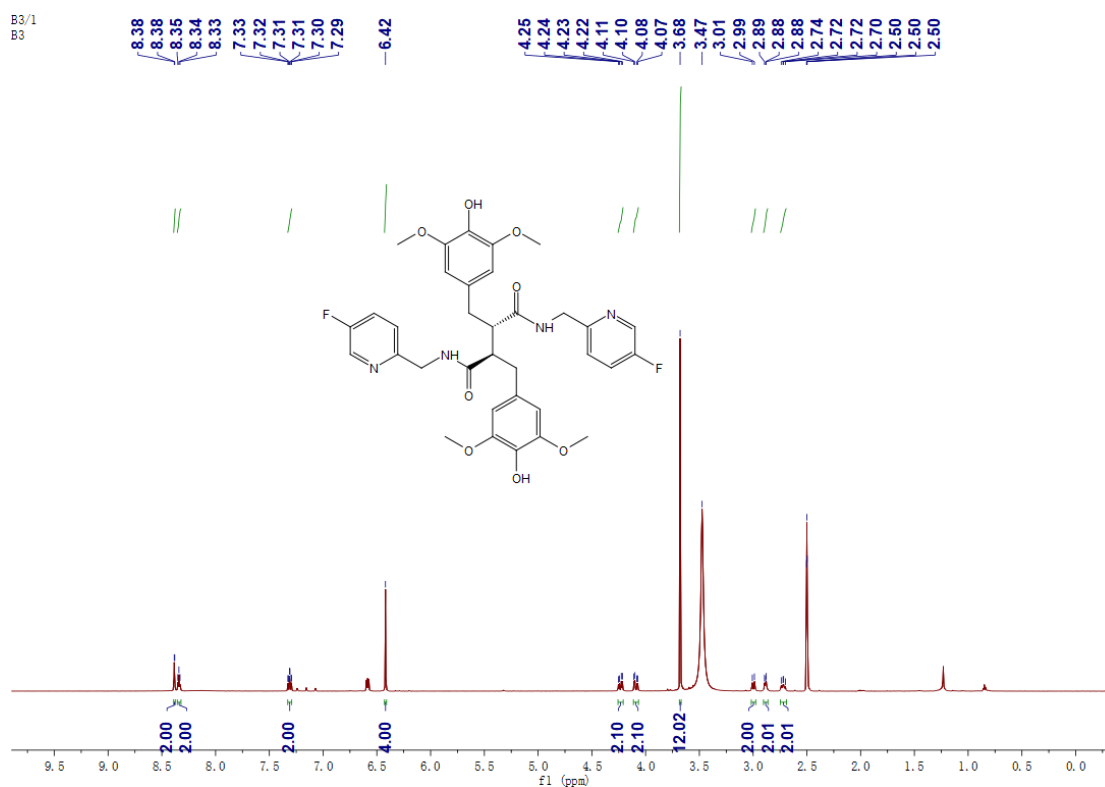

Figure S68 <sup>1</sup>H NMR spectrum of compound 12c

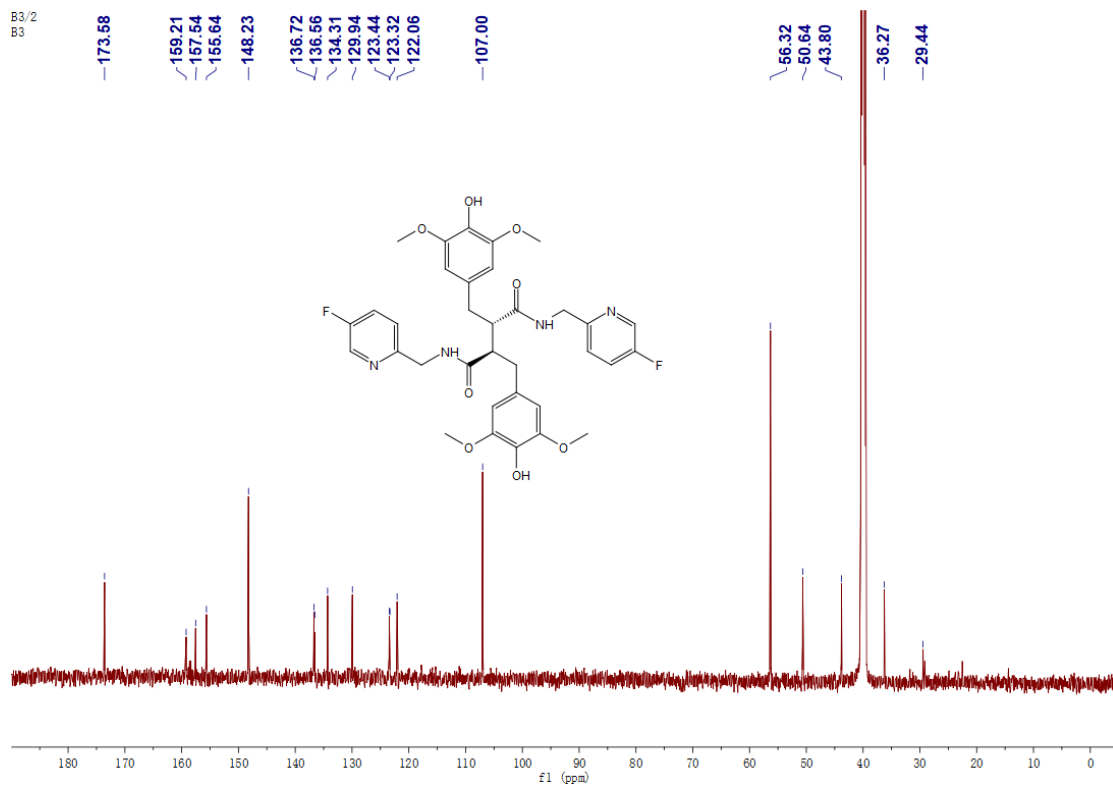

Figure S69  $^{13}\text{C}$  NMR spectrum of compound 12c

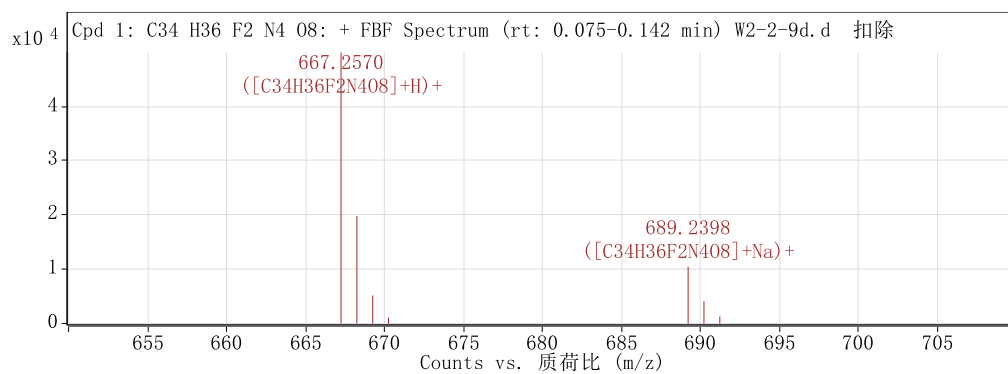

Figure S70 HRMS spectrum of compound 12c

## 25. $^1\text{H}$ NMR, $^{13}\text{C}$ NMR and HRMS spectrum of compound 12d

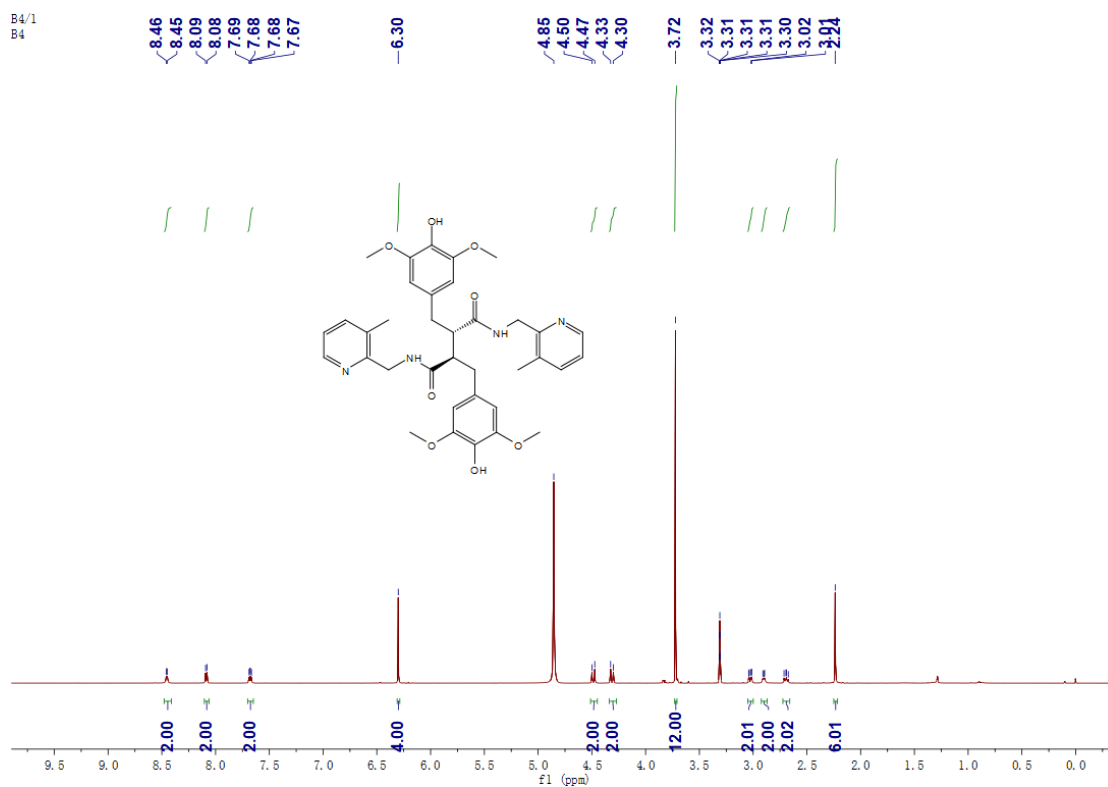

Figure S71  $^1\text{H}$  NMR spectrum of compound 12d

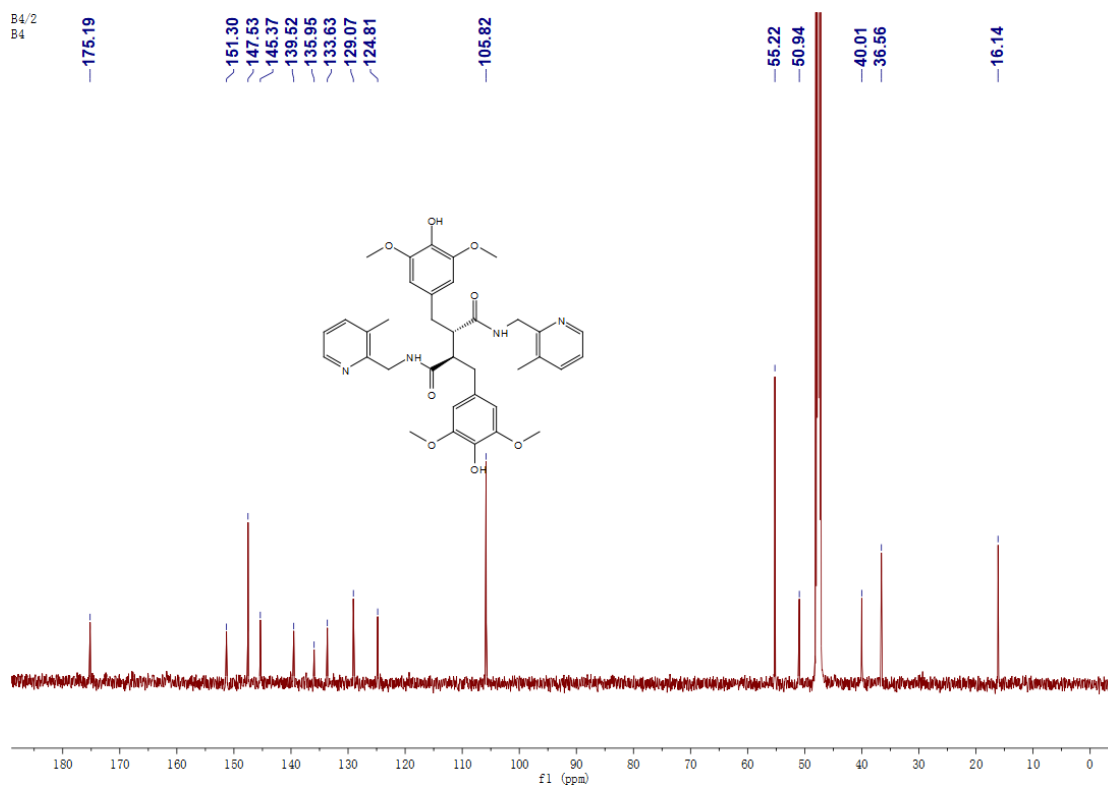

Figure S72  $^{13}\text{C}$  NMR spectrum of compound 12d

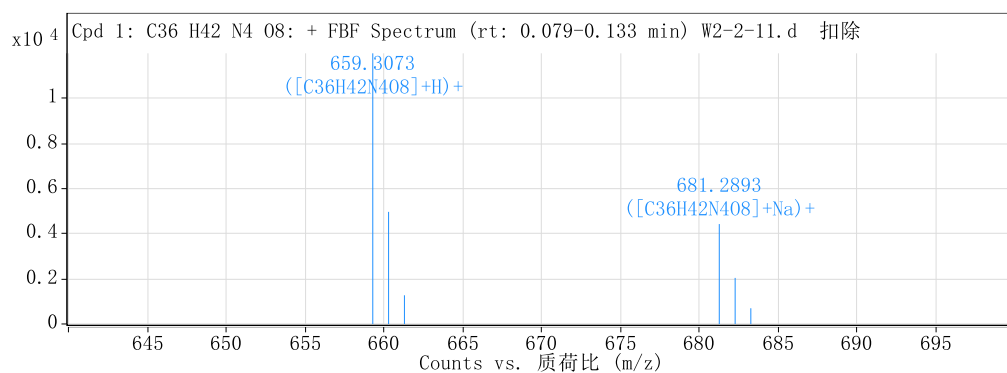

Figure S73 HRMS spectrum of compound 12d

26. <sup>1</sup>H NMR, <sup>13</sup>C NMR and HRMS spectrum of compound 12e

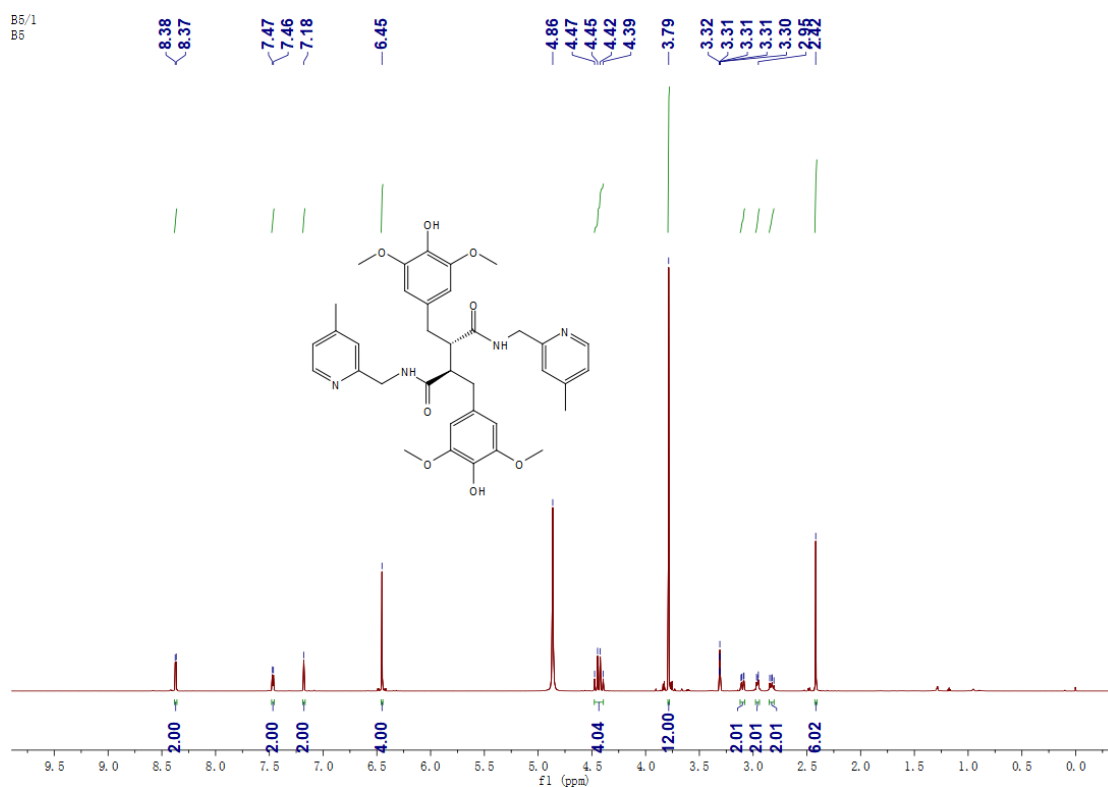

Figure S74 <sup>1</sup>H NMR spectrum of compound 12e



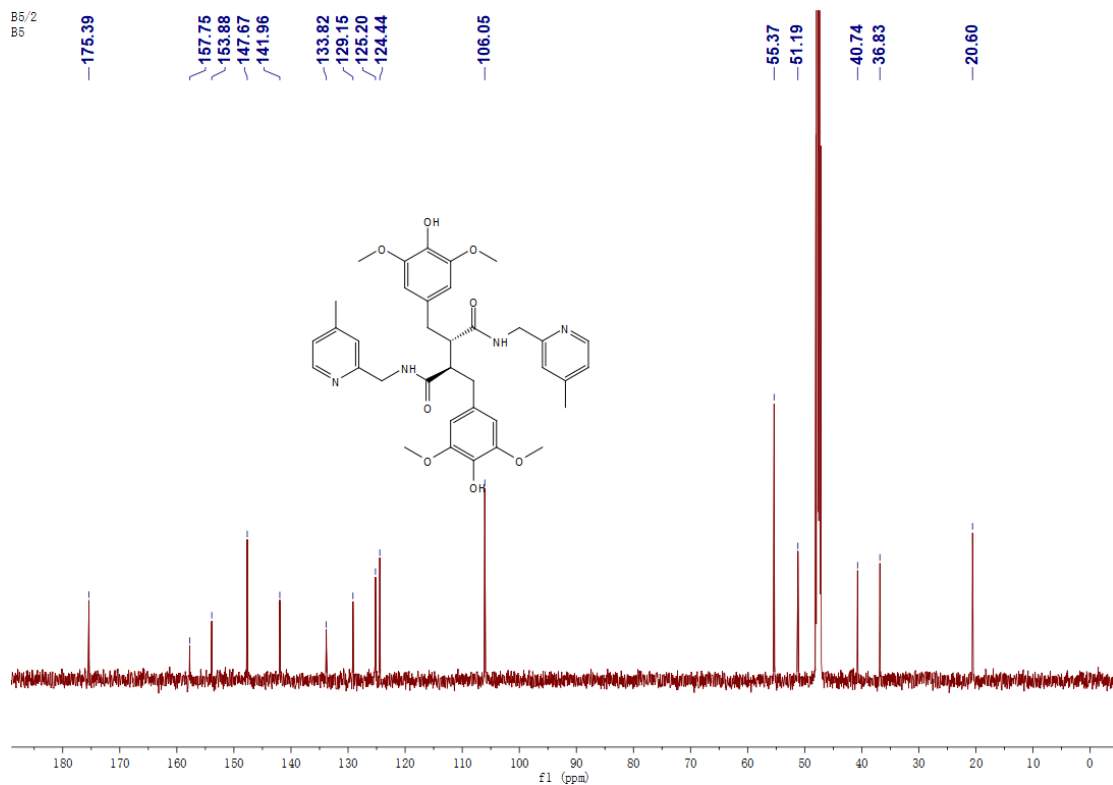

Figure S75  $^{13}\text{C}$  NMR spectrum of compound 12e

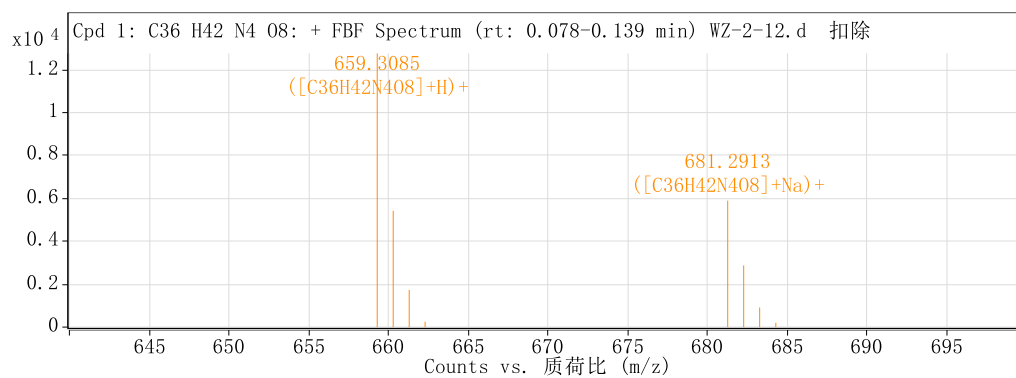

Figure S76 HRMS spectrum of compound 12e

## 27. <sup>1</sup>H NMR, <sup>13</sup>C NMR and HRMS spectrum of compound 12f

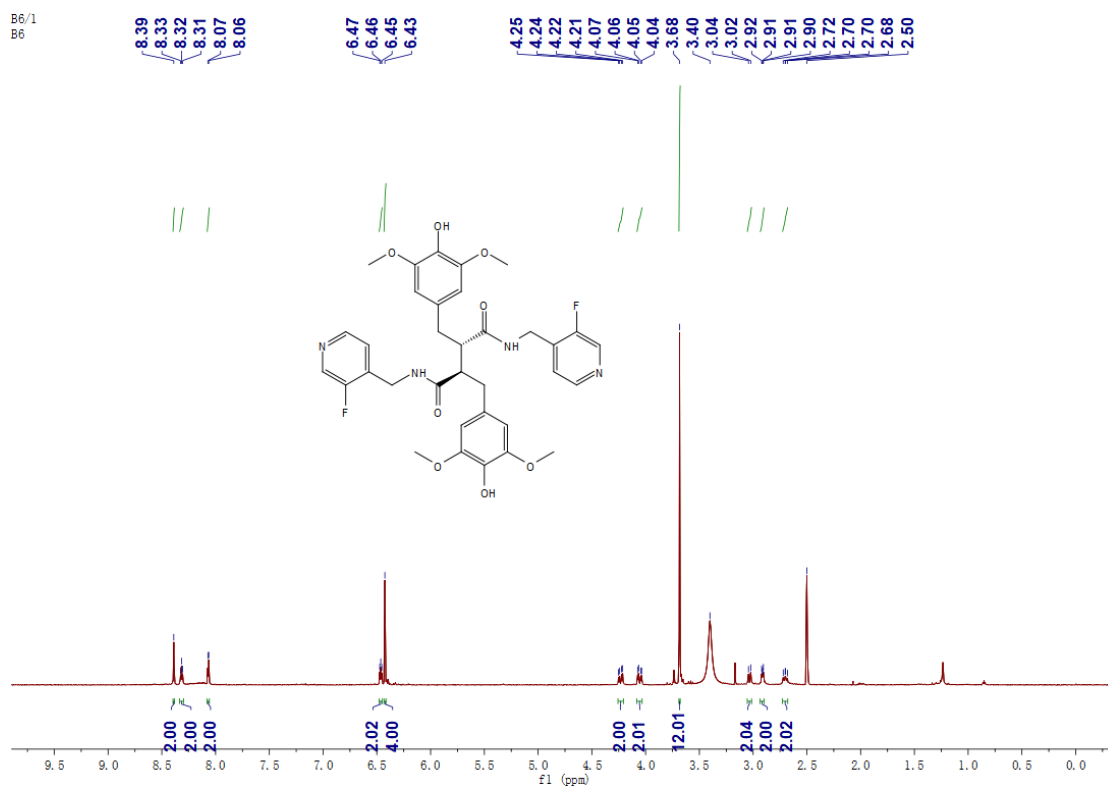

Figure S77 <sup>1</sup>H NMR spectrum of compound 12f

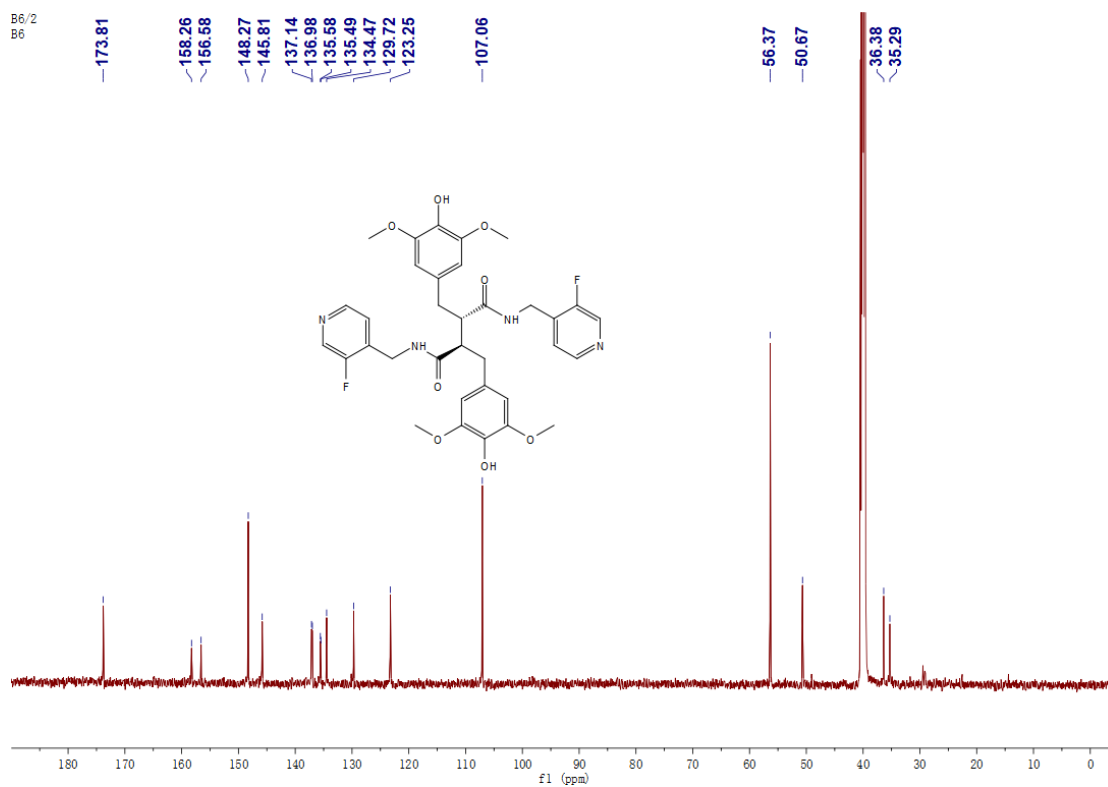

Figure S78 <sup>13</sup>C NMR spectrum of compound 12f

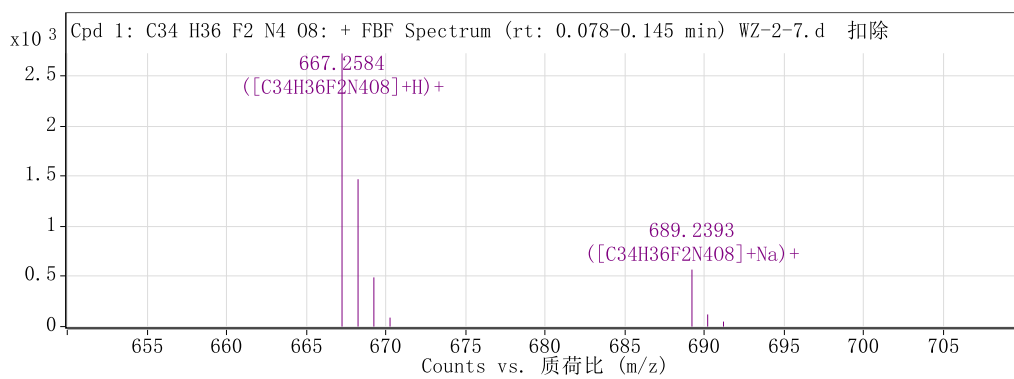

Figure S79 HRMS spectrum of compound 12f

28.  $^1H$  NMR,  $^{13}C$  NMR and HRMS spectrum of compound 12g

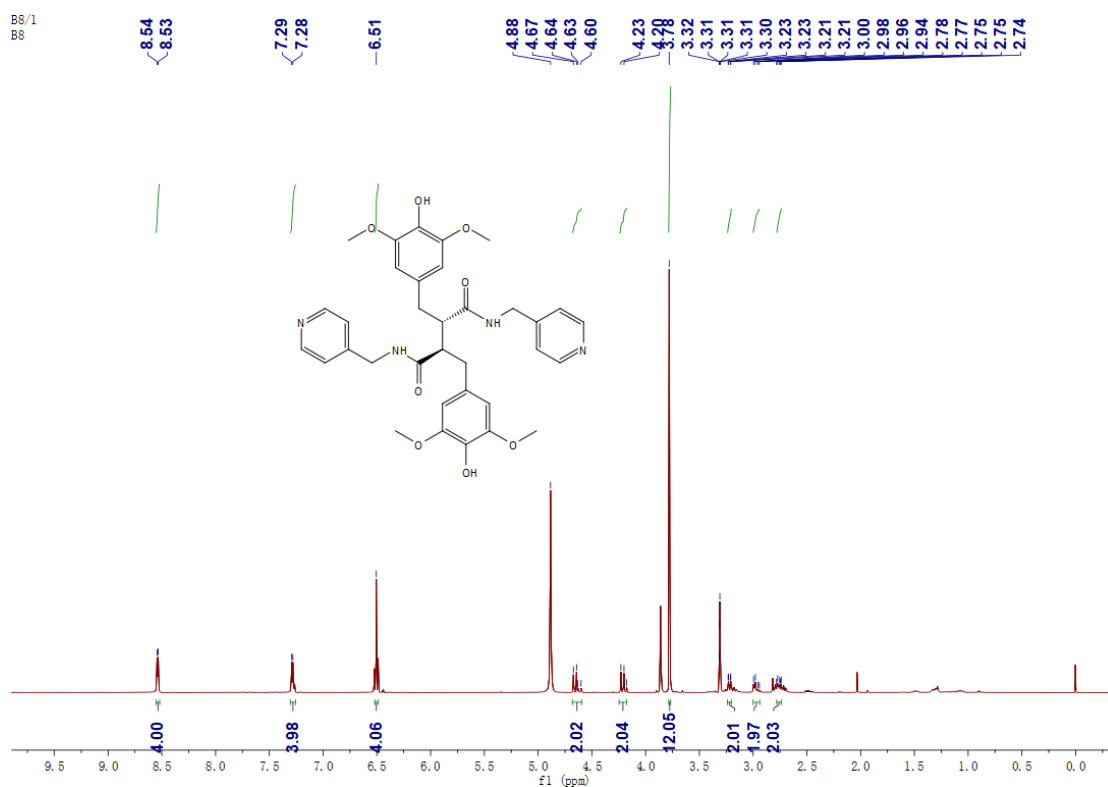

Figure S80  $^1H$  NMR spectrum of compound 12g

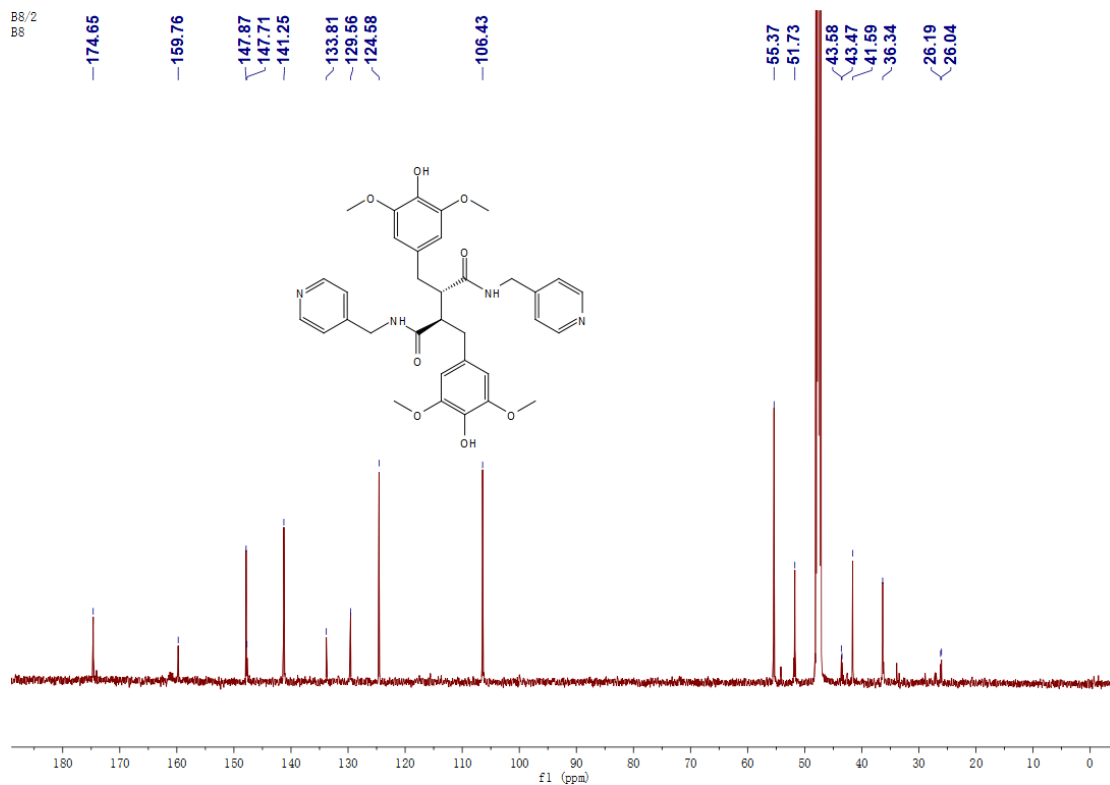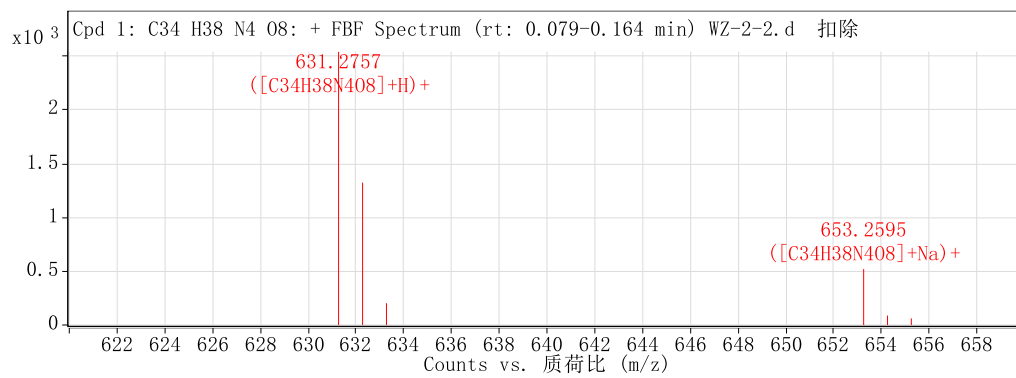

## 29. $^1\text{H}$ NMR, $^{13}\text{C}$ NMR and HRMS spectrum of compound 12h

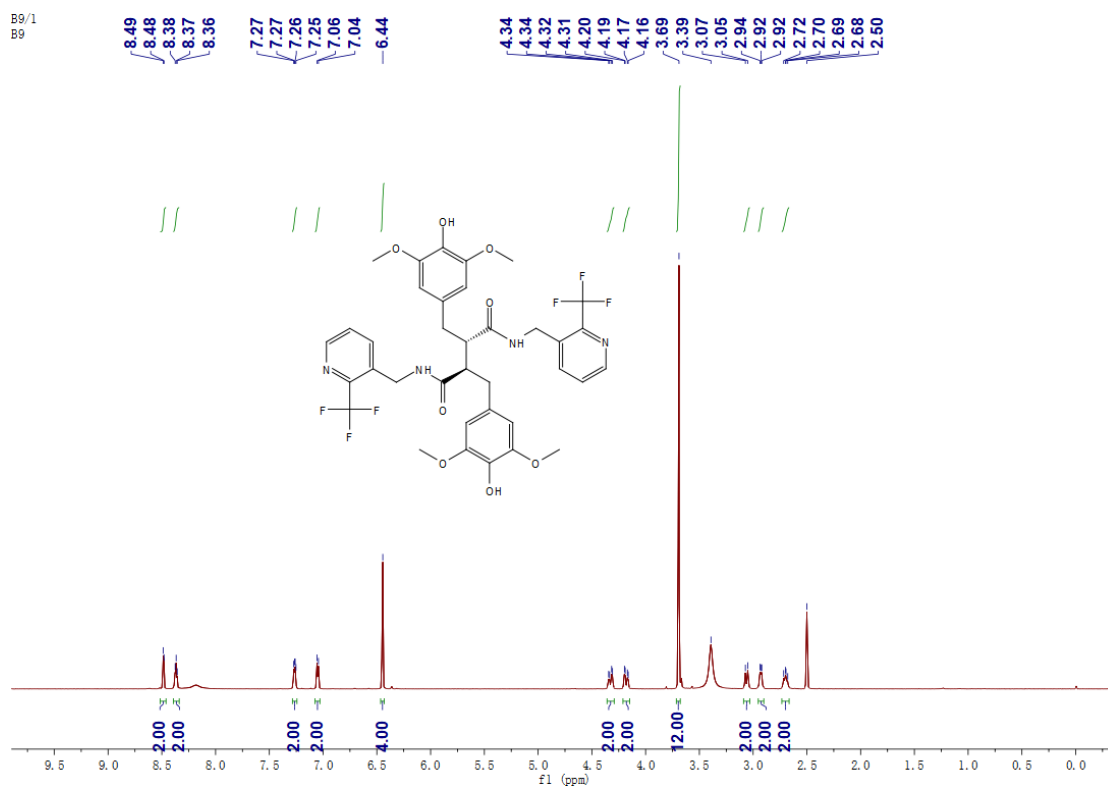

Figure S83  $^1\text{H}$  NMR spectrum of compound 12h

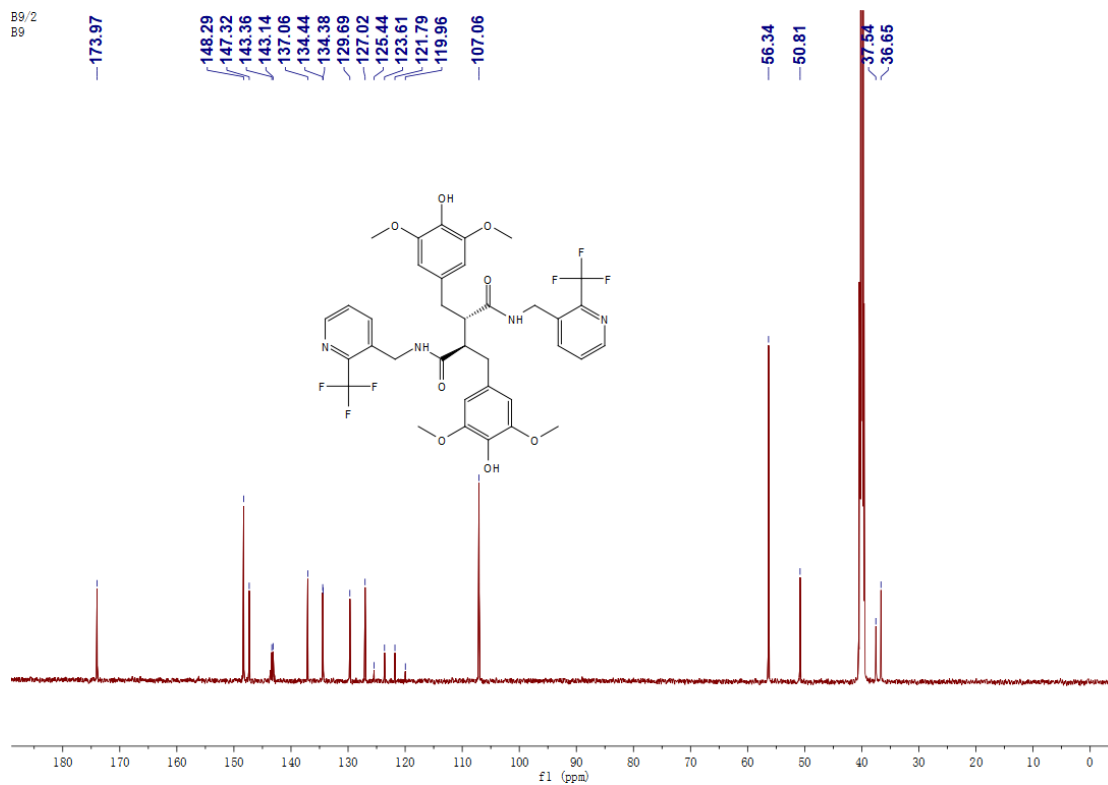

Figure S84  $^{13}\text{C}$  NMR spectrum of compound 12h

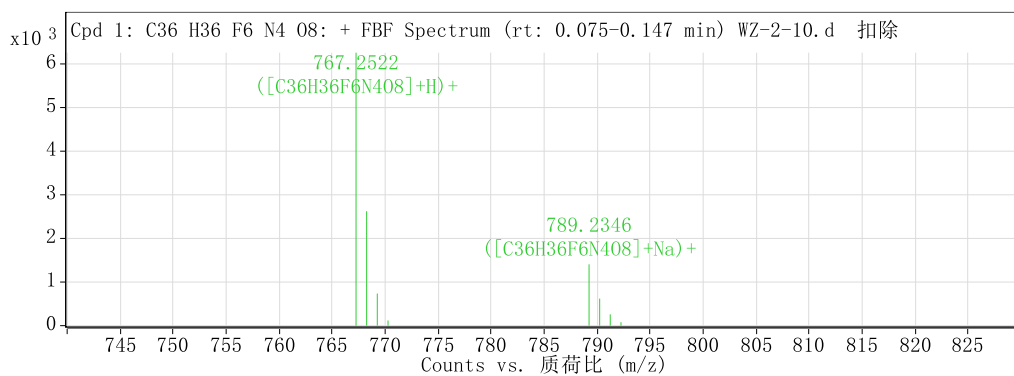

Figure S85 HRMS spectrum of compound 12h

30.  $^1\text{H}$  NMR,  $^{13}\text{C}$  NMR and HRMS spectrum of compound 12i

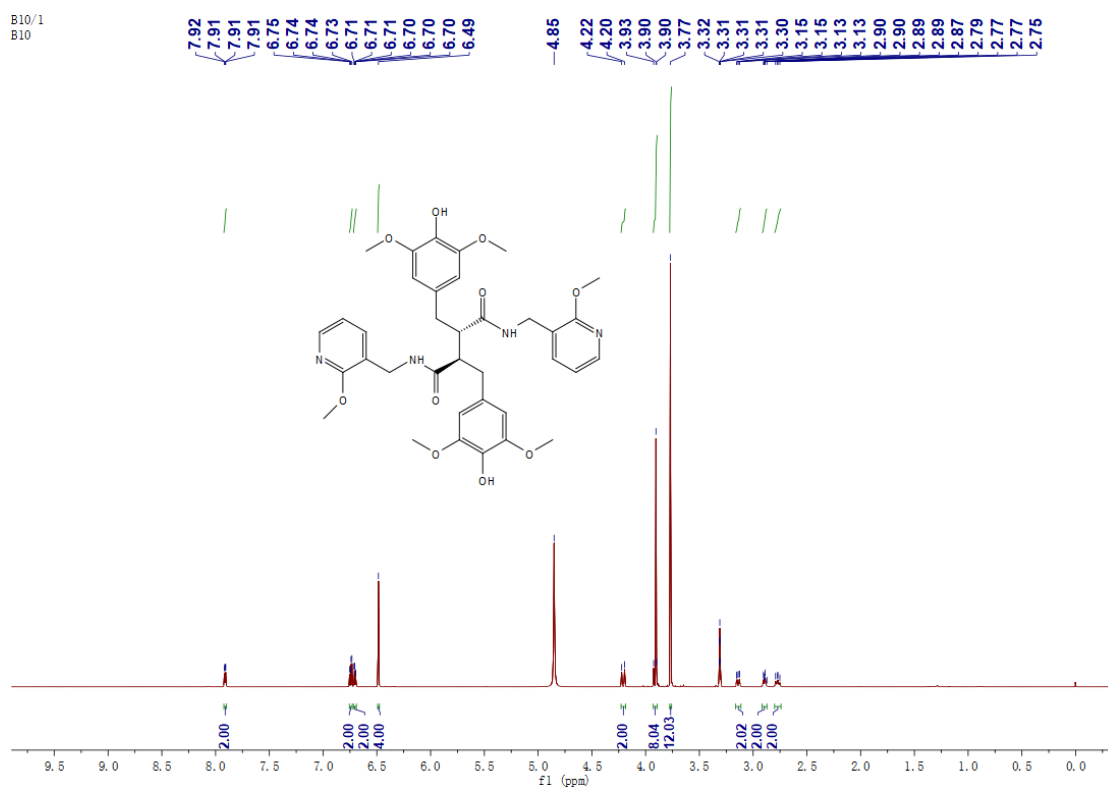

Figure S86  $^1\text{H}$  NMR spectrum of compound 12i

B10/2  
B10

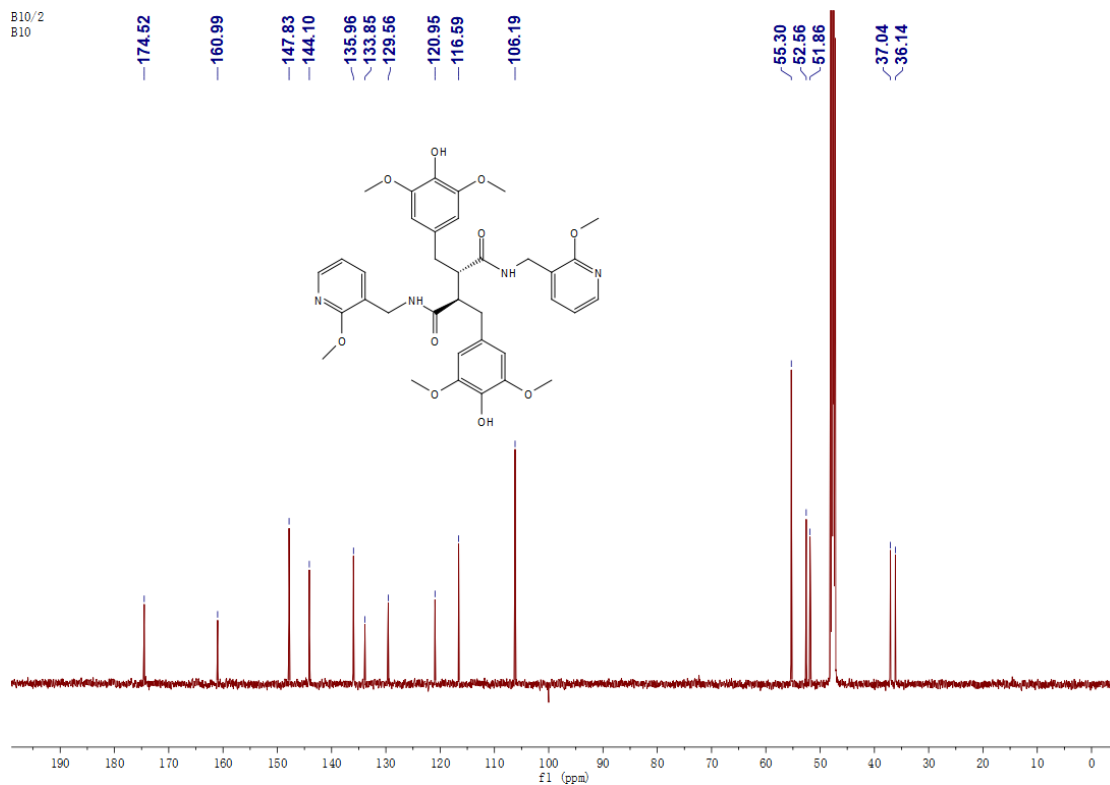

Figure S87  $^{13}\text{C}$  NMR spectrum of compound 12i

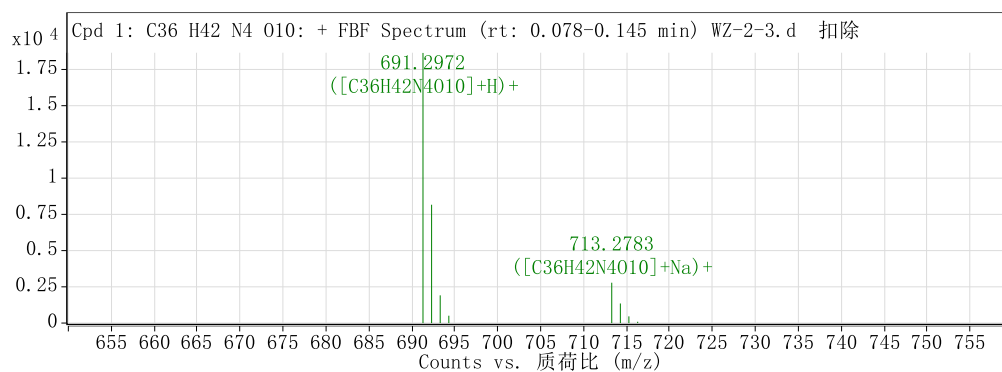

Figure S88 HRMS spectrum of compound 12i

### 31. Paw swelling thickness of mice in the *in vivo* anti-inflammatory experiments

| Time (min) | CON                |       |       |       |       |       |
|------------|--------------------|-------|-------|-------|-------|-------|
| 0          | 2.557              | 2.463 | 2.477 | 2.435 | 2.603 | 2.617 |
| 15         | 2.4                | 2.291 | 2.528 | 2.477 | 2.679 | 2.682 |
| 30         | 2.507              | 2.532 | 2.699 | 2.23  | 2.373 | 2.56  |
| 60         | 2.403              | 2.52  | 2.603 | 2.496 | 2.425 | 2.389 |
| 120        | 2.442              | 2.415 | 2.385 | 2.439 | 2.665 | 2.631 |
| 240        | 2.37               | 2.233 | 2.634 | 2.625 | 2.764 | 2.427 |
|            | Carr.              |       |       |       |       |       |
| 0          | 2.535              | 2.491 | 2.618 | 2.577 | 2.872 | 2.761 |
| 15         | 4.014              | 3.976 | 4.047 | 3.781 | 4.241 | 4.017 |
| 30         | 3.921              | 3.964 | 3.782 | 3.929 | 3.871 | 3.776 |
| 60         | 3.822              | 3.661 | 3.953 | 3.816 | 3.761 | 3.712 |
| 120        | 3.887              | 3.827 | 4.271 | 3.353 | 3.761 | 3.799 |
| 240        | 3.926              | 3.866 | 4.074 | 3.479 | 3.703 | 3.724 |
|            | Carr.+20 mg/kg LCA |       |       |       |       |       |
| 0          | 2.678              | 2.642 | 2.644 | 2.584 | 2.612 | 2.584 |
| 15         | 3.466              | 3.474 | 3.329 | 3.421 | 3.596 | 3.510 |
| 30         | 3.305              | 3.199 | 3.205 | 3.287 | 3.315 | 3.225 |
| 60         | 3.122              | 3.180 | 2.943 | 2.985 | 3.251 | 2.913 |
| 120        | 3.016              | 3.016 | 2.959 | 3.135 | 3.063 | 2.914 |
| 240        | 3.159              | 3.158 | 2.931 | 2.976 | 2.936 | 2.776 |
|            | Carr.+5 mg/kg 10h  |       |       |       |       |       |
| 0          | 2.648              | 2.557 | 2.633 | 2.708 | 2.621 | 2.600 |
| 15         | 3.881              | 3.812 | 3.659 | 4.052 | 3.821 | 3.669 |
| 30         | 3.685              | 3.496 | 3.603 | 3.647 | 3.725 | 3.552 |
| 60         | 3.619              | 3.953 | 3.180 | 2.946 | 3.457 | 3.647 |
| 120        | 3.643              | 3.550 | 3.332 | 3.495 | 3.193 | 3.643 |
| 240        | 3.855              | 3.741 | 2.982 | 3.474 | 3.279 | 3.739 |
|            | Carr.+20 mg/kg 10h |       |       |       |       |       |
| 0          | 2.839              | 2.430 | 2.706 | 2.590 | 2.643 | 2.228 |
| 15         | 3.510              | 3.451 | 3.833 | 3.404 | 3.401 | 2.959 |
| 30         | 3.318              | 3.243 | 3.475 | 3.252 | 3.390 | 3.222 |
| 60         | 3.268              | 3.109 | 3.411 | 3.063 | 3.138 | 2.728 |
| 120        | 2.945              | 3.072 | 3.106 | 3.199 | 3.097 | 3.011 |
| 240        | 3.203              | 2.986 | 3.164 | 2.904 | 2.953 | 3.118 |
